# Supplementary material for: Volume estimation models for avocado fruit
Source: PubMed Central journal article supplement (PMC8812970; doi:10.1371/journal.pone.0263564), 2022-02-03

**PLOS ONE**  
**Volume estimation models for tropical fruit**  
 --Manuscript Draft--

|                                                                                                                                                                                                                                                                                                                          |                                                                                                                                                                                                                                                                                                                                                                                                                                                                                                                                                                                                                                                                                                                                                                                                                                                                                                                                                                                                                                                                                                                                                                                                                                                                                                                                                                                                                                                                                                                                                                                                                                                                                                                                                                                                                                                                                                                                                                   |
|--------------------------------------------------------------------------------------------------------------------------------------------------------------------------------------------------------------------------------------------------------------------------------------------------------------------------|-------------------------------------------------------------------------------------------------------------------------------------------------------------------------------------------------------------------------------------------------------------------------------------------------------------------------------------------------------------------------------------------------------------------------------------------------------------------------------------------------------------------------------------------------------------------------------------------------------------------------------------------------------------------------------------------------------------------------------------------------------------------------------------------------------------------------------------------------------------------------------------------------------------------------------------------------------------------------------------------------------------------------------------------------------------------------------------------------------------------------------------------------------------------------------------------------------------------------------------------------------------------------------------------------------------------------------------------------------------------------------------------------------------------------------------------------------------------------------------------------------------------------------------------------------------------------------------------------------------------------------------------------------------------------------------------------------------------------------------------------------------------------------------------------------------------------------------------------------------------------------------------------------------------------------------------------------------------|
| <b>Manuscript Number:</b>                                                                                                                                                                                                                                                                                                | PONE-D-21-36255                                                                                                                                                                                                                                                                                                                                                                                                                                                                                                                                                                                                                                                                                                                                                                                                                                                                                                                                                                                                                                                                                                                                                                                                                                                                                                                                                                                                                                                                                                                                                                                                                                                                                                                                                                                                                                                                                                                                                   |
| <b>Article Type:</b>                                                                                                                                                                                                                                                                                                     | Research Article                                                                                                                                                                                                                                                                                                                                                                                                                                                                                                                                                                                                                                                                                                                                                                                                                                                                                                                                                                                                                                                                                                                                                                                                                                                                                                                                                                                                                                                                                                                                                                                                                                                                                                                                                                                                                                                                                                                                                  |
| <b>Full Title:</b>                                                                                                                                                                                                                                                                                                       | Volume estimation models for tropical fruit                                                                                                                                                                                                                                                                                                                                                                                                                                                                                                                                                                                                                                                                                                                                                                                                                                                                                                                                                                                                                                                                                                                                                                                                                                                                                                                                                                                                                                                                                                                                                                                                                                                                                                                                                                                                                                                                                                                       |
| <b>Short Title:</b>                                                                                                                                                                                                                                                                                                      | Fruit Volume estimation models                                                                                                                                                                                                                                                                                                                                                                                                                                                                                                                                                                                                                                                                                                                                                                                                                                                                                                                                                                                                                                                                                                                                                                                                                                                                                                                                                                                                                                                                                                                                                                                                                                                                                                                                                                                                                                                                                                                                    |
| <b>Corresponding Author:</b>                                                                                                                                                                                                                                                                                             | Mulugeta Mokra<br>ICRAF: World Agroforestry Centre<br>Addis Ababa, ETHIOPIA                                                                                                                                                                                                                                                                                                                                                                                                                                                                                                                                                                                                                                                                                                                                                                                                                                                                                                                                                                                                                                                                                                                                                                                                                                                                                                                                                                                                                                                                                                                                                                                                                                                                                                                                                                                                                                                                                       |
| <b>Keywords:</b>                                                                                                                                                                                                                                                                                                         | Agroforestry; Avocado; Fruit; Volume Models; Ethiopia                                                                                                                                                                                                                                                                                                                                                                                                                                                                                                                                                                                                                                                                                                                                                                                                                                                                                                                                                                                                                                                                                                                                                                                                                                                                                                                                                                                                                                                                                                                                                                                                                                                                                                                                                                                                                                                                                                             |
| <b>Abstract:</b>                                                                                                                                                                                                                                                                                                         | <p>Avocado (<i>Persea americana</i> Mill.) is a tropical tree, of the Lauraceae family, genus <i>Persea</i>. It is an important horticultural crop and proved to be a very profitable commercial crop for both local consumption and export. The physical characteristic of fruits are an important factor to determine the quality of fruit produced. On the other hand, estimation of fruit volume is time-consuming and impractical under field conditions. Thus, this study was conducted to devise cultivar-specific and generalized allometric models to analytically determine the non-destructive avocado fruit volume of five widely distributed avocado varieties. A significant relationship (<math>P \leq 0.01</math>) was found between Fruit diameter, length, and volume of each cultivar. Our best models (VM2 – for cultivar specific, and VM7-generalized model) has passed all the rigorous cross-validation and performance statistics tests and explained 94%, 92%, 87%, 93%, 94% and 93% of the variations in fruit volume of Ettinger, Fuerte, Hass, Nabal, Reed30, and Multiple cultivars, respectively. Our finding revealed that in the situations where measurements of volume would be inconvenient, or time consuming, a reliable volume and yield estimation can be obtained using site- and cultivar-specific allometric equations. Allometric models could also play a significant role in improving data availability on avocado fruit physical appearance which is critical to assess the quality and taste of fresh product influencing the purchase decision of customers. Moreover, such information can also be used as a ripeness index to predict optimum harvest time important for planned marketing. More importantly, the models might assist horticulturists, agronomists, and physiologists to conduct further study on avocado production and productivity through agroforestry landuse system across Ethiopia</p> |
| <b>Order of Authors:</b>                                                                                                                                                                                                                                                                                                 | <p>Mulugeta Mokra</p> <p>Aster Gebrekirstos, PhD</p> <p>Hadia Said</p> <p>Kiros Hadgu, PhD</p> <p>Niguse Hagazi</p> <p>Workneh Dubale</p> <p>Achim Bräuning</p>                                                                                                                                                                                                                                                                                                                                                                                                                                                                                                                                                                                                                                                                                                                                                                                                                                                                                                                                                                                                                                                                                                                                                                                                                                                                                                                                                                                                                                                                                                                                                                                                                                                                                                                                                                                                   |
| <b>Additional Information:</b>                                                                                                                                                                                                                                                                                           |                                                                                                                                                                                                                                                                                                                                                                                                                                                                                                                                                                                                                                                                                                                                                                                                                                                                                                                                                                                                                                                                                                                                                                                                                                                                                                                                                                                                                                                                                                                                                                                                                                                                                                                                                                                                                                                                                                                                                                   |
| <b>Question</b>                                                                                                                                                                                                                                                                                                          | <b>Response</b>                                                                                                                                                                                                                                                                                                                                                                                                                                                                                                                                                                                                                                                                                                                                                                                                                                                                                                                                                                                                                                                                                                                                                                                                                                                                                                                                                                                                                                                                                                                                                                                                                                                                                                                                                                                                                                                                                                                                                   |
| <p><b>Financial Disclosure</b></p> <p>Enter a financial disclosure statement that describes the sources of funding for the work included in this submission. Review the <a href="#">submission guidelines</a> for detailed requirements. View published research articles from <a href="#">PLOS ONE</a> for specific</p> | <p>This study was conducted with the financial support of the Africa Rising Project- a program financed by the United States Agency for International Development (USAID) as part of the United States Government's Feed the Future Initiative.</p>                                                                                                                                                                                                                                                                                                                                                                                                                                                                                                                                                                                                                                                                                                                                                                                                                                                                                                                                                                                                                                                                                                                                                                                                                                                                                                                                                                                                                                                                                                                                                                                                                                                                                                               |

examples.

This statement is required for submission and **will appear in the published article** if the submission is accepted. Please make sure it is accurate.

#### Unfunded studies

Enter: *The author(s) received no specific funding for this work.*

#### Funded studies

Enter a statement with the following details:

- Initials of the authors who received each award
- Grant numbers awarded to each author
- The full name of each funder
- URL of each funder website
- Did the sponsors or funders play any role in the study design, data collection and analysis, decision to publish, or preparation of the manuscript?
- **NO** - Include this sentence at the end of your statement: *The funders had no role in study design, data collection and analysis, decision to publish, or preparation of the manuscript.*
- **YES** - Specify the role(s) played.

\* typeset

#### Competing Interests

Use the instructions below to enter a competing interest statement for this submission. On behalf of all authors, disclose any [competing interests](#) that could be perceived to bias this work—acknowledging all financial support and any other relevant financial or non-financial competing interests.

This statement is **required** for submission and **will appear in the published article** if the submission is accepted. Please make sure it is accurate and that any funding sources listed in your Funding Information later in the submission form are also declared in your Financial Disclosure statement.

The authors have declared that no competing interests exist.

View published research articles from [PLOS ONE](#) for specific examples.

**NO authors have competing interests**

Enter: *The authors have declared that no competing interests exist.*

**Authors with competing interests**

Enter competing interest details beginning with this statement:

*I have read the journal's policy and the authors of this manuscript have the following competing interests: [insert competing interests here]*

\* typeset

**Ethics Statement**

N/A

Enter an ethics statement for this submission. This statement is required if the study involved:

- Human participants
- Human specimens or tissue
- Vertebrate animals or cephalopods
- Vertebrate embryos or tissues
- Field research

Write "N/A" if the submission does not require an ethics statement.

General guidance is provided below. Consult the [submission guidelines](#) for detailed instructions. **Make sure that all information entered here is included in the Methods section of the manuscript.**

**Format for specific study types**

**Human Subject Research (involving human participants and/or tissue)**

- Give the name of the institutional review board or ethics committee that approved the study
- Include the approval number and/or a statement indicating approval of this research
- Indicate the form of consent obtained (written/oral) or the reason that consent was not obtained (e.g. the data were analyzed anonymously)

**Animal Research (involving vertebrate animals, embryos or tissues)**

- Provide the name of the Institutional Animal Care and Use Committee (IACUC) or other relevant ethics board that reviewed the study protocol, and indicate whether they approved this research or granted a formal waiver of ethical approval
- Include an approval number if one was obtained
- If the study involved *non-human primates*, add *additional details* about animal welfare and steps taken to ameliorate suffering
- If anesthesia, euthanasia, or any kind of animal sacrifice is part of the study, include briefly which substances and/or methods were applied

**Field Research**

Include the following details if this study involves the collection of plant, animal, or other materials from a natural setting:

- Field permit number
- Name of the institution or relevant body that granted permission

**Data Availability**

Authors are required to make all data underlying the findings described fully available, without restriction, and from the time of publication. PLOS allows rare exceptions to address legal and ethical concerns. See the [PLOS Data Policy](#) and [FAQ](#) for detailed information.

Yes - all data are fully available without restriction

A Data Availability Statement describing where the data can be found is required at submission. Your answers to this question constitute the Data Availability Statement and **will be published in the article**, if accepted.

**Important:** Stating 'data available on request from the author' is not sufficient. If your data are only available upon request, select 'No' for the first question and explain your exceptional situation in the text box.

Do the authors confirm that all data underlying the findings described in their manuscript are fully available without restriction?

**Describe where the data may be found in full sentences. If you are copying our sample text, replace any instances of XXX with the appropriate details.**

- If the data are **held or will be held in a public repository**, include URLs, accession numbers or DOIs. If this information will only be available after acceptance, indicate this by ticking the box below. For example: *All XXX files are available from the XXX database (accession number(s) XXX, XXX).*
- If the data are all contained **within the manuscript and/or Supporting Information files**, enter the following: *All relevant data are within the manuscript and its Supporting Information files.*
- If neither of these applies but you are able to provide **details of access elsewhere**, with or without limitations, please do so. For example:

*Data cannot be shared publicly because of [XXX]. Data are available from the XXX Institutional Data Access / Ethics Committee (contact via XXX) for researchers who meet the criteria for access to confidential data.*

*The data underlying the results presented in the study are available from (include the name of the third party*

All relevant data are within the manuscript and its Supporting Information files.

*and contact information or URL).*

- This text is appropriate if the data are owned by a third party and authors do not have permission to share the data.

\* typeset

Additional data availability information:

# 1 Volume estimation models for tropical fruit

2

3 **Mulugeta Mokria<sup>a\*</sup>, Aster Gebrekirstos<sup>b</sup>, Hadia Said<sup>a</sup>, Kiros Hadgu<sup>a</sup>, Niguse Hagazi<sup>a</sup>,**  
4 **Workneh Dubale<sup>c</sup>, Achim Bräuning<sup>d</sup>**

5

6 <sup>a</sup>World Agroforestry (ICRAF), C/O ILRI Campus, Gurd Shola, P.O. Box 5689, Addis  
7 Ababa, Ethiopia

8 <sup>b</sup>World Agroforestry (ICRAF), United Nations Avenue, P.O. Box 30677-00100, Nairobi, Kenya

9 <sup>c</sup>International Livestock Research Institute (ILRI), Addis Ababa, Ethiopia.

10 <sup>d</sup>Institute of Geography, Friedrich-Alexander-University Erlangen-Nuremberg, Wetterkreuz 15,  
11 91058, Erlangen, Germany

12

13 \*Corresponding author, E-mail: [m.mokria@cgiar.org](mailto:m.mokria@cgiar.org); [mgmokria@gmail.com](mailto:mgmokria@gmail.com); ORCID:

14 <https://orcid.org/0000-0002-7812-8296>

15

## 16 Abstract

17 Avocado (*Persea americana* Mill.) is a tropical tree, of the Lauraceae family, genus *Persea*. It is  
18 an important horticultural crop and proved to be a very profitable commercial crop for both local  
19 consumption and export. The physical characteristic of fruits are an important factor to determine  
20 the quality of fruit produced. On the other hand, estimation of fruit volume is time-consuming  
21 and impractical under field conditions. Thus, this study was conducted to devise cultivar-specific  
22 and generalized allometric models to analytically determine the non-destructive avocado fruit  
23 volume of five wildy distributed avocado verities. A significant relationship ( $P \leq 0.01$ ) was

24 found between Fruit diameter, length, and volume of each cultivar. Our best models (VM2 – for  
25 cultivar specific, and VM7-generalized model) has passed all the rigorous cross-validation and  
26 performance statistics tests and explained 94%, 92%, 87%, 93%, 94% and 93% of the variations  
27 in fruit volume of Ettinger, Fuerte, Hass, Nabal, Reed30, and Multiple cultivars, respectively.  
28 Our finding revealed that in the situations where measurements of volume would be  
29 inconvenient, or time consuming, a reliable volume and yield estimation can be obtained using  
30 site- and cultivar-specific allometric equations. Allometric models could also play a significant  
31 role in improving data availability on avocado fruit physical appearance which is critical to  
32 assess the quality and taste of fresh product influencing the purchase decision of customers.  
33 Moreover, such information can also be used as a ripeness index to predict optimum harvest time  
34 important for planned marketing. More importantly, the models might assist horticulturists,  
35 agronomists, and physiologists to conduct further study on avocado production and productivity  
36 through agroforestry landuse system across Ethiopia.

37 **Key words:** Agroforestry, Avocado, Fruit, Volume Models, Ethiopia  
38

## 39 **1. Introduction**

40 Avocados are an evergreen subtropical species and the most economically important species of the  
41 Lauraceae family. It is grown commercially in America, Africa, Europe, Asia and Oceania. In 2019, the  
42 estimated world's total avocado production was about 7.2 million tonnes ~~and covering the total production~~  
43 ~~areas of~~ 726, 660 hectares (1). The major avocado growing countries are Mexico, USA, Colombia,  
44 Indonesia, Chile, the Dominican Republic, Kenya and South Africa (1). In Africa, Kenya and South Africa  
45 are leading in the production and export of avocado to the global market (2). In Ethiopia, it was first  
46 introduced around 1938 in the eastern and southern parts of the country and it is now being widely



47 distributed throughout the country, mainly used for household consumption and local market (3–5).

48 Currently, Ethiopia is one of the top five avocado producing country in sub-Saharan Africa (SSA) and the

49 20th in the world (1).

50 Avocado is recognized ~~that besides being~~ a source of energy and vitamins, it also provides specific non-

51 nutritive physiological benefits that may enhance health (6), thus, it can be considered as a "functional food"

52 (7). It is one of the top important commercial crop to be traded at a global scale (8,9), and becoming one of

53 the most promising fruit crops for both food and nutrition security and earning considerable amount of

54 financial return from export and domestic market (10–12). Due to government initiatives in promoting

55 investment in horticulture sector as well as combating climate change through land diversification and

56 agroforestry practices, the plantation and the production of avocado is considerably increasing over the last

57 few years across different parts of Ethiopia. Despite the expansion of avocado tree plantation, the physical

58 characteristic of avocado fruits and productivity of small scall avocado farming are not well studied in

59 Ethiopia. On the other hand, information of fruit size are critical factors to determine the quality of the

60 avocados and has been used to describe the fruit's growth curve, predict yield, and conduct physiological

61 studies (13). More importantly, on-tree and non-destructive volume estimates can be used as a ripeness

62 index to predict maturity and optimum harvest time, and can ~~inform~~ packing material (tray insert)

63 purchasing and marketing arrangements (14). For physiological studies, measurement of the size of

64 individual fruit over time allows to monitor fruit expansion rate and its response to physiological disorders

65 and agronomic conditions (14,15). Moreover, in the context of postharvest operations, fruit size

66 determination is important for several reasons, such as to determine packing material, fruit classified into

67 batches of uniform size, assign market and price differentials of large and small produce, to match consumer

68 preferences (16). Thus, the availability of reliable fruit size information is critical in horticultural crop

69 processing and marketing. Fruit volume is also a good measure of size, but direct measurement of fruit

70 volume using water displacement approach is ~~expensive and~~ time-consuming as well as impractical under  
71 field conditions. On the other hand, length and width measurements of avocado fruit are quick and easy in  
72 the field or indoors and can be used to numerically represent fruit volume and weight. Therefore, this study  
73 was conducted to: (a) determine fruit volume of five avocado varieties, (b) determine which biometric  
74 parameter of the avocado fruit best correlates with volume; (c) derive various cultivar-specific and mixed-  
75 cultivar allometric equations to predict fruit volume and (d) to evaluate the predictive performances of the  
76 equations and to identify the best allometric equation for the study region.

## 77 **2. Materials and methods**

### 78 **2.1 Study area and climate characterises.**

79 The study was conducted in the Upper Gana (7° 34' 24'' N, 37° 46' 4''E) and Jewe (7° 30' 35'' N, 37° 47'  
80 1'') Kebeles of Limu district, situated in Hadiya zone, in the Ethiopian Southern Nations, Nationalities, and  
81 Peoples' Region (SNNPR) (17) (Fig. 1). The study area is located at 223 km South of Addis Ababa. The  
82 altitudinal ranges of Jewe and upper-Gana Kebles were between 2000 and 2400m ~~a.s.l.~~ (Fig. 1). Based on  
83 the data from CSA 2007, the district has an estimated total population of 153,783 and 93% of the people are  
84 living in the rural areas and practicing subsistence farming depending on rain fed production system (18).  
85 The average farm size per family head was estimated to be 0.5 ha (17).  
86 In the study area, the annual rainfall ranges between 1300 and 1400 mm with a bi-modal rainfall seasonality  
87 , occurring from February to April and from June to September (17). The average annual minimum and  
88 maximum temperatures were 18 °C and 23 °C (17). The typical landuse system of the district is  
89 characterized by Agroforestry (i.e., mixed crop-tree-livestock production). (19). The district has a  
90 favourable climate and agroecological condition for multi-strata agroforestry and home garden intensive  
91 farming system.

92 **Fig. 1. The location of the study area in Hadiya zone, Ethiopia**

## 93 2.2. Tree selection for sample fruit collection

94 In this study, five different avocado cultivars including Ettinger (E), Fuerte (F), Hass (H), Nabal  
95 (N), and Reed30 (R) were considered. From each cultivar, 30 ~~(thirty)~~ avocado trees, ~~which~~  
96 representing 30 small scale farmlands, were selected for fruit sample collection. Fruit ~~sample~~  
97 were collected ~~following the~~ considering each radii of the crown (20–23). A total of 360 ~~sample~~  
98 ~~fruits~~ were randomly harvested from each cultivar (i.e., three fruits from each radius or 12  
99 sample fruits per tree = 12 fruit \* 30 trees = 360 fruits). Then, ~~Fruit~~ length (FL in mm), diameter  
100 (FD in mm) and weight (FW in g) were measured using digital calliper and ~~scale~~, respectively.  
101 For fruit volume measurement, the collected sample fruits were first classified ~~in to~~ three size  
102 ~~class~~ (small, medium, and large). Then, ~~fifteen (15)~~ fruits were randomly selected from each size  
103 class (total = 45 fruits from each cultivar). For each fruit, actual fruit volume (AFV) was  
104 measured using water displacement method (13,24), in the Biotechnology Laboratory of  
105 Wachemo University (WCU), Hossana, Ethiopia.

## 106 2.3. Model development, performance evaluation and cross-validation test

107 Cultivar-specific and mixed-cultivar generalized avocado fruit volume (FV) estimation models  
108 were developed using linear and non-linear regression equations based on either fruit diameter,  
109 fruit length alone or both fruit length and diameter at the same time as independent variables.  
110 Moreover, using two predictors (i.e., length and diameter) may introduce potential problems of  
111 co-linearity, resulting in poor precision in the estimates of the corresponding regression  
112 coefficients (25). Thus, for detecting the variance inflation factor ( $VIF = 1/(1-r^2)$ ) and the  
113 tolerance values ( $T = 1/VIF$ ) were calculated (26). Where r is the correlation coefficient between  
114 length and diameter of fruit. VIF value exceeding 10 or if T value was smaller than 0.10 then co-

115 linearity may have a considerable impact on the prediction of the parameters, and consequently  
116 one of those should be excluded from the model (27,28).

117 Model performance was checked using various goodness-of-fit statistics, such as the Coefficient  
118 of Determination ( $R^2$ ), Standard Error of Estimate (SEE), Index of Agreement (D), Mean  
119 Absolute Bias (MAB), Percent Bias (PBIAS), Root Mean Square Error (RMSE), Prediction  
120 Residuals Sum of Squares (PRESS), Reduction of error (RE), and Coefficient efficiency (CE),  
121 (29–31). The estimation models with higher  $R^2$  may sometimes also have unstable parameters  
122 estimate. Thus, we further calculated Percent Relative Standard Error (PRSE) of the coefficients  
123 and Weighted Akaike information criterion (AIC<sub>w</sub>) to check the stability of model parameter  
124 estimates (25). Outlier and influential diagnostic test statistics, including Cook's distance,  
125 Leverage point, Studentized Residuals and DFFITS were analysed to examine the accuracy of  
126 model fit (25,32). Finally, Models were evaluated and ranked based on all goodness-of-fit  
127 statistics, outlier, and influential diagnostic statistics (31).

128 To validate the best fitting equation for volume estimation, model cross-validation was  
129 conducted following a split-sample approach in which 45 measured fruit sample were partitioned  
130 into two sets, 33 for “training” (i. e., to develop the equations) and the remaining 12 fruit  
131 samples for “testing” the equations. The partitioning was performed according to the following  
132 procedure. From each size class (small, medium, and large) of the samples, four samples were  
133 randomly selected to form the “test” dataset and the remaining sample fruits were used to form  
134 the “training” dataset. The goodness-of-fit statistics and equation coefficients of the “training”  
135 equations were compared with those derived using the full dataset, and the estimated and  
136 measured volume of “test” sample fruit compared (31,33,34). Finally, the full dataset was used  
137 to build fruit volume estimation models.

## 138 2.4. Statistical analysis

139 Pearson correlation tests were conducted between actual Fruit volume (AFV)-fruit diameter (FD)  
140 and fruit length (FL) to be able to identify which fruit biometric variables were most strongly  
141 correlated with fruit volume (FV). A correlation analysis was also conducted between  
142 independent variables (i.e., FL vs FD). The differences among avocado varieties in AFV was  
143 assessed using one-way analysis of variance and the significance of differences were tested using  
144 the least significant difference test (LSD) with  $P < 0.05$  (31).

## 145 3. Result and discussion

### 146 3.1. The relationship of physical characteristics of avocado fruits

147 The physical characteristics of sample avocado fruits and their statistical attributes are presented  
148 in Table 1. The actual fruit volume (FV) ranged from 125 – 480 cm<sup>3</sup>, fruit weights (FW) ranged  
149 from 129 – 595 g, fruit length (FL) ranged from 64.5- 129.9 mm, and fruit diameter (FD) ranged  
150 from 53.8 – 99.8 mm (Table 1). These findings are in line with ~~values in~~ other reports (35–37).  
151 Information on fruit physical appearance is important for the customer who is used to assess the  
152 quality and taste of fresh product influencing the purchase decision (14).

153 The relationship between fruit volume and other pomological traits (i.e., FL, FD, FV) were  
154 significant ( $P < 0.01$ ) (Fig. 2) and that is in agreement with other studies that have showed strong  
155 relationships between different pomological traits of avocado fruit (36). Moreover, the  
156 correlation between FD and FV were consistently stronger compared to the relationship between  
157 FL and FV (Fig. 2), indicating the FD is a very good predictor of fruit volume and highlighting  
158 those changes in diameter, therefore, affects the fruit volume more than does a change in fruit  
159 length. More importantly, knowing the relationship between fruit physical characteristics is  
160 critical in the horticultural sector because these pomological traits are sometime used as fruit

161 maturity index (36,38,39). Several indices have been used to determine avocado fruit maturity,  
 162 hence there is no single factor can be considered the most important; however, it can be said that  
 163 from a postharvest standpoint, quality begins at harvest with physiological maturity. This  
 164 indicates that understanding the stage of physiological maturity is critical for the development of a  
 165 successful avocado fresh fruit industry while assuring the quality to the consumer (40).

166 **Fig. 2. Fruit volume as a function of fruit length, diameter, and regression of fruit diameter**  
 167 **as a function of fruit length.**

168 **Table 1.** Summary of volume, and fruit size characteristics of five avocado cultivars

| SPP name  | Fruit Length (mm) |             | Fruit Diameter (mm) |           | Fruit wight (g) |         | Fruit Volume (cm <sup>3</sup> ) |         |
|-----------|-------------------|-------------|---------------------|-----------|-----------------|---------|---------------------------------|---------|
|           | Mean [SE]         | Range       | Mean [SE]           | Range     | Mean [SE]       | Range   | Mean [SE]                       | Range   |
| Ettingenr | 108.9 [±1.5]      | 91.9 -129.9 | 69.1 [±0.9]         | 57.1-84.2 | 253 [±8.8]      | 162-375 | 274.1 [±10.1]                   | 145-410 |
| Fuerte    | 106.2 [±1.4]      | 87.7 -124.6 | 68.4 [±0.8]         | 57.4-79.6 | 248.8 [±8.2]    | 146-348 | 252.0 [±7.4]                    | 150-350 |
| Hass      | 90.3 [±1.4]       | 72.8 -113.9 | 64.7 [±0.8]         | 53.8 -76  | 192.6 [±7.0]    | 116-310 | 181.6 [±5.8]                    | 110-300 |
| Nabal     | 92.6 [±1.5]       | 70.1 -118.7 | 82.6 [±1.2]         | 65.8-99.8 | 331.9 [±13.8]   | 160-595 | 324.7 [±11.3]                   | 180-480 |
| Reed_30   | 81.3 [±1.3]       | 64.5 -98.1  | 74.1 [±1.1]         | 60.8-89.2 | 242.3 [±10.3]   | 129-426 | 247.1 [±10.4]                   | 125-420 |

169

### 170 3.2. Allometric equations and model cross-validation

171 As a preliminary step to model calibration, the degree of collinearity among fruit length and  
 172 diameter was analysed. The VIF was ranged from 1.1 to 4.6 and T values ranged from 0.21 to  
 173 0.95, depending on cultivar type, respectively (Supplementary information (S)). Hence, for all  
 174 selected genotypes, VIF was < 10 and T was > 0.10, showing that the co-linearity between  
 175 predictors (fruit length and diameter) is negligible, thus both predictors (FL, FD) were  
 176 considered during model formation (27,28) (S).

177 Cultivar specific and mixed cultivar generalized volume model was developed to approximate  
 178 the shape of an avocado fruits using either fruit length (FL) or width (FD) separately and using  
 179 both predictors at a time. We found that the predictive performance of tested model form were  
 180 varied within cultivar (Table 2, S). This might be attributed to differences in the equation forms  
 181 and predictors included in the models (31). Allometric model performance analysis and cross-

182 validation test results showed that the Linear Regression Model (MV2) which includes only FD  
183 as predictor was ranked the best model given the set of nine (9) candidate model forms for all  
184 cultivar-specific models, while the Multiple Linear Regression Model (VM7) was the best for  
185 generalized mixed cultivar model (Table 2, S).

186 Our best model explained 94%, 92%, 87%, 93%, 94% and 93% of fruit volume in Ettinger,  
187 Fuerte, Hass, Nabal, Reed30 and mixed-avocado cultivar model, respectively (Fig. 3, Table 2, in  
188 Supporting Information for more details). The three best performing models for each avocado  
189 cultivar and mixed-cultivar are shown in Table 2, where the influence of coefficients was  
190 significant ( $P < 0.01$ ) (Table 2). Our best model (VM2 for cultivar specific) and VM7 – for  
191 mixed cultivar models have passed all the rigorous verification and cross-validation statistical  
192 test and produced the lowest average relative error (PBIAS%), implying that fruit diameter is  
193 reliable predictors of cultivar specific fruit volume, while using both FL and FD might increase  
194 the predictive performances of generalized allometric models (S). Moreover, the performance of  
195 our best models (VM2, and VM7) to make an accurate prediction is not an artifact of over fitting,  
196 because the parameter values were stable across the subset of the cross-validations “training data  
197 set” and full data set (S). Moreover, the volume of the twelve “test” fruit volume estimated with  
198 the cross-validation equations (i.e., training dataset) differed little from the values estimated with  
199 equations produced with the full dataset (Fig. 3, S). The deviations (PBIAS%) in the volume  
200 estimates between the two sets of equations were less than 1% for all and mixed cultivar  
201 equations (Fig. 3). Moreover, the PRSE value of  $< 20\%$  and outliers and influential points of less  
202 than 10% of the total observation as well as higher positive value of CE, and RE provides  
203 evidence that the parameter estimates were reliable in the selected best models (25,41–43) (S).

204 Thus, VM2 (i.e., cultivar specific model) and VM7 (i.e., generalized model) are reliable to

205 determine the fruit volume based on their easily measurable fruit pomological traits (i.e., FL  
206 or/and FD). Furthermore, measuring fruit length and diameter are easy in the field, thus site-and  
207 cultivar specific allometric model would enable researchers to make non-destructive or repeated  
208 measurements on the same fruits. Our allometric models could provide accurate estimate of  
209 avocado fruit volume and may reduce required time and financial resources while using common  
210 method of volume measurements like water displacement, gas displacement and expensive  
211 instruments, e.g., image processing software or machine vision techniques. In line with this, a  
212 review literature showed that there are different **non-destructive** volume estimation models  
213 developed for different type of fruits ~~from easily measurable parameters~~, such as for pepper  
214 (13,15), ~~for~~ Babassu (*Attalea speciosa*) fruit (44), Karanda (*Carissa carandas*) fruit (27), ~~for~~ Apple  
215 fruit (45). Our **finding** confirmed that non-destructive allometric models based on easily  
216 measurable morphometric dimensions can be more accurate and practical in field conditions than  
217 destructive methods used in traditional growth curves (16).

218 **Fig. 3. Relationships between the Fruit volume each cultivar and fruit diameter (left panel)**  
219 **and corresponding plots of residuals (modelled minus measured fruit volume values)**  
220 **(right). Fig.3a-F1/F2 refers Ettinger, Fuerte, Hass, Nabal, Reed30 and Mixed cultivar.**

221



222 **Table 2.** Equations and goodness-of-fit performance statistics for estimating avocado fruit volume of five different cultivars and  
 223 multiple cultivars grown in Limo district, Hadiya, zone.

| Model forms     | Model forms            | Model parameter |                 |               | Performance statistics |       |           |       |       |       |      |      |      |         |         | PRSE    |      |             | Rank |          |
|-----------------|------------------------|-----------------|-----------------|---------------|------------------------|-------|-----------|-------|-------|-------|------|------|------|---------|---------|---------|------|-------------|------|----------|
|                 |                        | a               | b               | c             | R2                     | SEE   | PRESS     | RMSE  | PBIAS | MAB   | Di   | RE   | CE   | AICi    | Δi(AIC) | Wi(AIC) | a    | b           |      | c        |
| <b>Ettinger</b> |                        |                 |                 |               |                        |       |           |       |       |       |      |      |      |         |         |         |      |             |      |          |
| M2              | a*FD + b               | <b>10.4484</b>  | <b>-447.701</b> |               | 0.94                   | 17.53 | 13210.88  | 17.13 | 0.00  | 12.20 | 0.98 | 1.00 | 0.94 | 259.70  | 11.31   | 0.00    | 4.0  | -6.5        |      | <b>1</b> |
| M4              | a*FD <sup>2</sup>      | <b>0.0575</b>   |                 |               | 0.88                   | 24.19 | 25752.29  | 23.92 | -0.94 | 18.94 | 0.96 | 0.99 | 0.88 | 287.73  | 39.34   | 0.00    | 1.2  |             |      | <b>2</b> |
| M9              | a*(FL*FD) <sup>2</sup> | <b>4.53E-06</b> |                 |               | 0.74                   | 35.17 | 54412.87  | 34.77 | 2.71  | 28.37 | 0.95 | 0.98 | 0.74 | 321.40  | 73.01   | 0.00    | 1.9  |             |      | <b>3</b> |
| <b>Fuerte</b>   |                        |                 |                 |               |                        |       |           |       |       |       |      |      |      |         |         |         |      |             |      |          |
| M2              | a*FD + b               | <b>8.369</b>    | <b>-320.756</b> |               | 0.92                   | 14.81 | 9425.88   | 14.47 | 0.00  | 10.93 | 0.98 | 1.00 | 0.92 | 244.50  | 0.22    | 0.46    | 4.6  | -8.3        |      | <b>1</b> |
| M4              | a*FD <sup>2</sup>      | <b>0.0536</b>   |                 |               | 0.89                   | 16.33 | 11733.34  | 16.15 | -0.31 | 12.71 | 0.97 | 1.00 | 0.89 | 252.36  | 8.07    | 0.01    | 0.9  |             |      | <b>2</b> |
| M7              | a+ b*FL + c*FD         | <b>-333.124</b> | 0.5107          | <b>7.757</b>  | 0.92                   | 14.62 | 8973.05   | 14.12 | 0.00  | 10.62 | 0.98 | 1.00 | 0.92 | 244.29  | 0.00    | 0.52    | -8.3 | <b>68.5</b> | 7.3  | <b>3</b> |
| <b>Hass</b>     |                        |                 |                 |               |                        |       |           |       |       |       |      |      |      |         |         |         |      |             |      |          |
| M2              | a*FD + b               | <b>6.5239</b>   | <b>-240.661</b> |               | 0.87                   | 14.33 | 8832.76   | 14.01 | 0.00  | 9.00  | 0.96 | 0.99 | 0.87 | 306.82  | 69.78   | 0.00    | 5.8  | -10.3       |      | <b>1</b> |
| M4              | a*FD <sup>2</sup>      | <b>0.0432</b>   |                 |               | 0.86                   | 14.65 | 9438.43   | 14.48 | -0.41 | 10.30 | 0.96 | 0.99 | 0.86 | 237.04  | 0.00    | 0.71    | 1.2  |             |      | <b>2</b> |
| M7              | a+ b*FL + c*FD         | <b>-252.658</b> | 0.5479          | <b>5.9447</b> | 0.88                   | 13.93 | 8149.19   | 13.46 | 0.00  | 9.03  | 0.97 | 0.99 | 0.88 | 239.96  | 2.91    | 0.17    | -9.9 | <b>53.3</b> | 8.1  | <b>3</b> |
| <b>Nabal</b>    |                        |                 |                 |               |                        |       |           |       |       |       |      |      |      |         |         |         |      |             |      |          |
| M2              | a*FD + b               | <b>9.314</b>    | <b>-444.277</b> |               | 0.93                   | 20.20 | 17549.35  | 19.75 | 0.00  | 14.44 | 0.98 | 1.00 | 0.93 | 272.47  | 7.34    | 0.02    | 5.57 | -7.13       |      | <b>1</b> |
| M4              | a*FD <sup>2</sup>      | <b>0.0475</b>   |                 |               | 0.90                   | 24.42 | 26241.01  | 24.15 | -0.63 | 20.08 | 0.97 | 0.99 | 0.90 | 288.58  | 23.45   | 0.00    | 1.05 |             |      | <b>2</b> |
| M1              | a*FL + b               | <b>6.8725</b>   | <b>-311.718</b> |               | 0.80                   | 34.55 | 51343.88  | 33.78 | 0.00  | 27.55 | 0.94 | 0.99 | 0.80 | 320.78  | 55.65   | 0.00    | 7.55 | -15.51      |      | <b>3</b> |
| <b>Reed30</b>   |                        |                 |                 |               |                        |       |           |       |       |       |      |      |      |         |         |         |      |             |      |          |
| M2              | a*FD + b               | <b>9.3255</b>   | <b>-443.701</b> |               | 0.94                   | 17.99 | 13912.04  | 17.58 | 0.00  | 13.52 | 0.98 | 1.00 | 0.94 | 262.02  | 9.72    | 0.01    | 4.0  | -6.2        |      | <b>1</b> |
| M4              | a*FD <sup>2</sup>      | <b>0.0453</b>   |                 |               | 0.86                   | 25.95 | 29637.53  | 25.66 | -1.56 | 21.66 | 0.95 | 0.99 | 0.86 | 294.06  | 41.76   | 0.00    | 1.5  |             |      | <b>2</b> |
| M1              | a*FL + b               | <b>7.0449</b>   | <b>-325.924</b> |               | 0.83                   | 29.02 | 36221.43  | 28.37 | 0.00  | 22.30 | 0.95 | 0.99 | 0.83 | 305.08  | 52.79   | 0.00    | 6.8  | -12.0       |      | <b>3</b> |
| <b>Mo=ixed</b>  |                        |                 |                 |               |                        |       |           |       |       |       |      |      |      |         |         |         |      |             |      |          |
| M7              | a+ b*FL + c*FD         | <b>-435.118</b> | <b>1.8844</b>   | <b>7.1102</b> | 0.93                   | 20.23 | 90851.70  | 18.84 | 0.00  | 15.44 | 0.98 | 0.99 | 0.93 | 1327.16 | 0.00    | 1.00    | -3.0 | 5.2         | 2.2  | <b>1</b> |
| M2              | a*FD + b               | <b>7.7671</b>   | <b>-301.595</b> |               | 0.82                   | 32.86 | 240785.37 | 29.00 | 0.00  | 27.08 | 0.95 | 0.99 | 0.82 | 1519.21 | 192.04  | 0.00    | 3.1  | -5.8        |      | <b>2</b> |
| M4              | a*FD <sup>2</sup>      | <b>0.0491</b>   |                 |               | 0.81                   | 33.77 | 255523.93 | 30.18 | -0.41 | 27.80 | 0.94 | 0.98 | 0.81 | 1535.16 | 208.00  | 0.00    | 0.8  |             |      | <b>3</b> |

224 **Fig. 4. Relationship between estimated and measured total aboveground biomass of the 12**  
225 **cross- validation test fruits. Circles are the volume estimates calculated using the full data**  
226 **set equations and the crosses are the estimates calculated using the cross-validation**  
227 **training dataset equations. On fig. 3, the letter E, F, H, N, R and M refers Ettinger, Fuerte,**  
228 **Hass, Nabal, Reed30 and Mixed cultivar data.**

### 229 3.3. Conclusions and recommendation

230 This study provided the first avocado cultivar-specific and mixed-cultivar generalized allometric  
231 equations to estimate avocado fruit volume non-destructively. Among tested model forms, VM2  
232 (for cultivar-specific model), and VM7 (generalized model) have passed all rigorous verification  
233 and cross-validation statistical tests, confirming that the models have sufficient skill to estimate  
234 fruit volume from easily measurable parameters. Our best allometric models (VM2 and ~~VM2~~)  
235 explained > 87% of the variation in measured fruit volumes of each cultivar. A high degree of  
236 correlation ( $R^2 > 0.93$ ) between measured and estimated fruit volume provided quantitative  
237 evidence of the validity of the selected volume estimation models. The allometric equation  
238 developed in this research could be practical in the estimation of avocado fruit volume and  
239 applicable under field conditions. Besides, the generalized mixed-cultivar model can reliably be  
240 used to estimate avocado fruit volume when cultivar type is unknown. Our finding revealed that  
241 in the situations where fruit length and diameter measurements are possible and/or where  
242 measurements of volume would be inconvenient, or time consuming, site- and cultivar-specific  
243 allometric equations can be used to estimate fruit volume while it on the tree. Therefore, the  
244 allometric equations generated in this study could play a considerable role in improving data  
245 availability on avocado fruit physical appearance which is critical to assess the quality and taste  
246 of fresh product, which in turn, influencing the purchase decision of customers. It can also  
247 potentially assist horticulturists, agronomists, and physiologists to estimate fruit volume of  
248 avocado accurately and to carry out yield estimation prior to harvesting.

#### 249 4. Acknowledgements

250  
251 We thank the local community and local administration offices in the study area for their support  
252 during fieldwork. We are also grateful to Mr. Eyuel Tesfaye, and Mr. Demeke Beyen for their  
253 facilitation to the field work and organizing the team of experts for data collection. The contents  
254 of this document are solely the responsibility of the author/s and does not necessarily represent  
255 the official views of USAID or the U.S. Government or that of the institutional position of  
256 ICRAF (World Agroforestry).

#### 257 5. Funding

258 This study was conducted with the financial support of the Africa Rising Project- a program  
259 financed by the United States Agency for International Development (USAID) as part of the  
260 United States Government's Feed the Future Initiative.

#### 261 6. Authors' contributions

262  
263 “Mulugeta Mokria, Aster Gebrekirstos, Hadia Said, Kiros Hadgu, Niguse Hagazi, Workneh  
264 Dubale, Achim Bräuning” designed the study. Mulugeta Mokria collected the sample fruits  
265 across the study sites, performed all sample preparation, measurements and carried out the first  
266 analysis and wrote the first version of the manuscript, which was intensively discussed and  
267 revised by all authors”.

268

#### 269 7. Conflict of interest

270 The authors declare no competing interests

#### 271 8. Reference

- 272 1. FAOSTAT. Agricultural production data [Internet]. 2020 [cited 2020 Dec 25]. Available  
273 from: <http://www.fao.org/faostat/en/#data/QC>.
- 274 2. Altendorf S. Major tropical fruits market review 2018. [Internet]. Rome, FAO. The; 2019.

- 275 Available from: [www.sykescottages.co.uk](http://www.sykescottages.co.uk)
- 276 3. Tadesse A. Market Chain Analysis Of Fruits For Gomma Woreda, Jimma Zone, Oromia  
277 National Regional State. Haramaya University; 2011.
- 278 4. Faris A. Review on Avocado Value Chain in Ethiopia. *Ind Eng Lett.* 2016;6(3):33–40.
- 279 5. Megerssa B. The role of avocado production in coffee based farming systems of South  
280 Western Ethiopia : The case of Jimma zone. *African J Agric Res.* 2013;8(19):2285–96.
- 281 6. Dorantes L, Parada L, Ortiz A. Post-harvest Operations. Mejía AD, editor. 2004.
- 282 7. Palou A, Serra F, Pico C. General aspects on the assessment of functional foods in the  
283 European Union. *Eur J Clin Nutr.* 2003;57:S12–7.
- 284 8. USDA. Avocados, Raw, all commercial varietie. [Internet]. Vol. 28,  
285 <https://fdc.nal.usda.gov/fdc-app.html#/food-details/171705/nutrients>. 2020. p. 1–43.  
286 Available from: [doi/10.1177/1120700020921110](https://doi.org/10.1177/1120700020921110)
- 287 9. Fulgoni VL, Dreher M, Davenport AJ. Avocado consumption is associated with better diet  
288 quality and nutrient intake, and lower metabolic syndrome risk in US adults: Results from  
289 the National Health and Nutrition Examination Survey (NHANES) 2001-2008. *Nutr J.*  
290 2013;12(1):1–6.
- 291 10. Shumeta Z. Avocado Production and Marketing in Southwestern Ethiopia. *Trends Agric*  
292 *Econ.* 2010;3(4):190–206.
- 293 11. Elias S. Supply Chain Analysis of Avocado and Mango Fruits in Gedeo Zone.  
294 2016;6(9):46–55.
- 295 12. Terheggen A, Chains GV, Trade C, Livelihoods L. Ethiopia ’ s Potential Role in the

- 296 Global Avocado Market. 2019;(October).
- 297 13. Kadri Bozokalfa M, Kilic M. Mathematical Modeling in the Estimation of Pepper  
298 (Capsicum annuum L.) Fruit Volume. Chil J Agric Res. 2010;70(4):626–32.
- 299 14. Wang Z, Walsh KB, Verma B. On-tree mango fruit size estimation using RGB-D images.  
300 Sensors (Switzerland). 2017;17(12):1–15.
- 301 15. Ngouajio M, Kirk W, Goldy R. A simple model for rapid and nondestructive estimation of  
302 bell pepper fruit volume. HortScience. 2003;38(4):509–11.
- 303 16. Moreda GP, Ortiz-Cañavate J, García-Ramos FJ, Ruiz-Altisent M. Non-destructive  
304 technologies for fruit and vegetable size determination - A review. J Food Eng.  
305 2009;92(2):119–36.
- 306 17. Riga FT. Biomass yield and nutritive value of sweet lupine in mid altitudes of Lemo  
307 District, Hadiya Zone, Southern Ethiopia. [Internet]. Vol. 9. Wolaita Sodo University;  
308 2017. Available from:  
309 <https://doi.org/10.1016/j.tmaid.2020.101607>  
310 <https://doi.org/10.1016/j.ijssu.2020.02.034>  
311 <https://doi.org/10.1016/j.jinf.2020.04.011>  
312 <https://doi.org/10.1016/j.ssci.2020.104773>
- 313 18. CSA-Ethiopia. Summary and Statistical Report pf the 2007 Population and Housing  
314 Census [Internet]. Addis Ababa, Ethiopia; 2008. Available from:  
315 <http://www.ghbook.ir/index.php?name=سازده سراسری اندید شئی هم دومین مقالات مجموعه>  
316 [http://www.ghbook.ir/index.php?option=com\\_dbook&task=readonline&book\\_id=13629&page=108&chkhask=03C706812F&Itemid=218&lang=fa&tmpl=component](http://www.ghbook.ir/index.php?option=com_dbook&task=readonline&book_id=13629&page=108&chkhask=03C706812F&Itemid=218&lang=fa&tmpl=component)

- 318 19. Mekonnen K, Yasabu S, Gebremedhin B, Woldemeskel E, Tegegne A, Thorne P, editors.  
319 Promoting productivity and market access technologies and approaches to improve farm  
320 income and livelihoods in Ethiopia: Lessons from action research projects. Proceedings of  
321 a Workshop, ILRI, Addis Ababa, 8–9 December 2016. Nairobi, Kenya: ILRI. In Nairobi,  
322 Kenya: ILRI; 2019. Available from: <http://africa-rising>.
- 323 20. Schaffer B, Baranowski RM. Sample size estimates for avocado yield experiments. *J Am*  
324 *Soc Hortic Sci.* 1986;111(6):985–7.
- 325 21. Zilkah S, Klein I. Growth Kinetics and Deremiantion of Shape and Size of Small and  
326 Large Avocado Fruits Cultivar’ Hass’ On the Tree. *Sci Hortic (Amsterdam).*  
327 1987;32(195):195–202.
- 328 22. Marini RP. Estimating mean fruit weight and mean fruit value for apple trees: Comparison  
329 of two sampling methods with the true mean. *J Am Soc Hortic Sci.* 2001;126(4):503–10.
- 330 23. Marini RP, Schupp JR, Baugher TA, Crassweller R. Sampling apple trees to accurately  
331 estimate mean fruit weight and fruit size distribution. *HortScience.* 2019;54(6):1017–22.
- 332 24. Erickson LC, Kikuta Y. Determination of Surface Area and Volume of Avocado Fruits.  
333 1965;(Figure 1).
- 334 25. Sileshi GW. A critical review of forest biomass estimation models, common mistakes and  
335 corrective measures. *For Ecol Manage [Internet].* 2014;329:237–54. Available from:  
336 <http://dx.doi.org/10.1016/j.foreco.2014.06.026>
- 337 26. Gill JL. Outliers, residuals, and influence in multiple regression. *J Anim Breed Genet.*  
338 1986;

- 339 27. Mahanti KK, Rathan SK, Ravanappa V, Vadivel S, Ramakrishnaiah JB. A Regression  
340 Model for Nondestructive Fruit Volume Estimation in Karonda (C Arissa C Arandus L  
341 Estimation Carandus L.). *Suppl Agron.* 2016;11(1):659–62.
- 342 28. Johnston R, Jones K, Manley D. Confounding and collinearity in regression analysis: a  
343 cautionary tale and an alternative procedure, illustrated by studies of British voting  
344 behaviour. *Qual Quant.* 2018;52(4):1957–76.
- 345 29. Seong C, Herand Y, Benham BL. Automatic calibration tool for hydrologic simulation  
346 program-FORTRAN using a shuffled complex evolution algorithm. *Water (Switzerland).*  
347 2015;7(2):503–27.
- 348 30. Mokia M, Gebrekirstos A, Abiyu A, Noordwijka M Van, Brauning A. Multi-century tree-  
349 ring precipitation record reveals increasing frequency of extreme dry events in the upper  
350 Blue Nile River catchment. *Glob Chang Biol.* 2017;23:2222–49.
- 351 31. Mokia M, Mekuria W, Gebrekirstos A, Aynekulu E, Belay B, Gashaw T, et al. Mixed-  
352 species allometric equations and estimation of aboveground biomass and carbon stocks in  
353 restoring degraded landscape in northern Ethiopia. *Environmeantal Res Lett.* 2018;00:00.
- 354 32. Rahman SMAK, Sathik MM, Kannan KS. Multiple Linear Regression Models in Outlier  
355 Detection. *Int J Res Comput Sci.* 2012;2(2):23–8.
- 356 33. Negash M, Starr M, Kanninen M, Berhe L. Allometric equations for estimating  
357 aboveground biomass of *Coffea arabica* L. grown in the Rift Valley escarpment of  
358 Ethiopia. *Agrofor Syst [Internet].* 2013 Apr 4 [cited 2013 Dec 3];87(4):953–66. Available  
359 from: <http://link.springer.com/10.1007/s10457-013-9611-3>

- 360 34. Burnham KP, Anderson DR. Model Selection and Multimodel Inference: A Practical  
361 Information-Theoretic Approach (2nd ed) [Internet]. Vol. 172, Ecological Modelling.  
362 2002. 488 p. Available from:  
363 <http://linkinghub.elsevier.com/retrieve/pii/S0304380003004526>
- 364 35. Bayram S, Alper Arslan M, Turgutoğlu E, Erkan M. The performance of some avocado  
365 cultivars under Mediterranean coastal conditions in Turkey. J Food, Agric Environ.  
366 2012;10(2):588–92.
- 367 36. Bayram S, Tepe S. Determination of some physicochemical properties in fruits of some  
368 avocado (*Persea americana* Mill.) cultivars during the harvesting periods. Derim.  
369 2019;(May).
- 370 37. Janice DA, John A, Jemmy FT. Morphological characteristics of avocado (*Persea*  
371 *americana* Mill.) in Ghana. African J Plant Sci. 2018;12(4):88–97.
- 372 38. Lee SK, Young RE, Schiffman PM, Coggins CW. Maturity Studies of Avocado Fruit  
373 Based on Picking Dates and Dry Weight. J Amer Soc Hort Sci. 1983;108(3):390–4.
- 374 39. Woolf A, Clark C, Terander E, Phetsomphou V, Hofshi R, Arpaia L, et al. Measuring  
375 avocado maturity; ongoing developments Allan. THE ORCHARDIST. 2003.
- 376 40. Barmore CR. Avocado Fruit Maturity. Proc First Int Trop Fruit Short Course Avocado JW  
377 Sauls, RL Phillips LK Jackson (eds) Gainesv Fruit Crop Dept, Florida Coop Ext Serv Inst  
378 Food Agric Sci Univers. 1976;103–9.
- 379 41. Ammann CM, Wahl ER. The importance of the geophysical context in statistical  
380 evaluations of climate reconstruction procedures. Clim Change. 2007;85(1–2):71–88.



- 381 42. Krause P, Boyle DP, Base F. Comparison of different efficiency criteria for hydrological  
382 model assessment. *Adv Geosci* [Internet]. 2005;5(89):89–97. Available from:  
383 <http://www.adv-geosci.net/5/89/2005/>
- 384 43. Moriasi DN, Arnold JG, Liew MW Van, Bingner RL, Harmel RD, Veith TL. Model  
385 evaluation guidelines for systematic quantification of accuracy in watershed simulations.  
386 *Am Soc Agric Biol Eng*. 2007;50(3):885–900.
- 387 44. Vanderlei RS, Silva JV, Moura F de BP. Biometry and non-destructive allometric model  
388 for estimating Babassu (*Attalea speciosa*) fruit volume and densities. *Rev Ouricuri*.  
389 2019;9(2):1–10.
- 390 45. Kejun Y, Ruihong S. *An Introduction to the New Estimation Formulae of Apple Fruit*  
391 *Volume and Surface Area*. 2013.

392

393

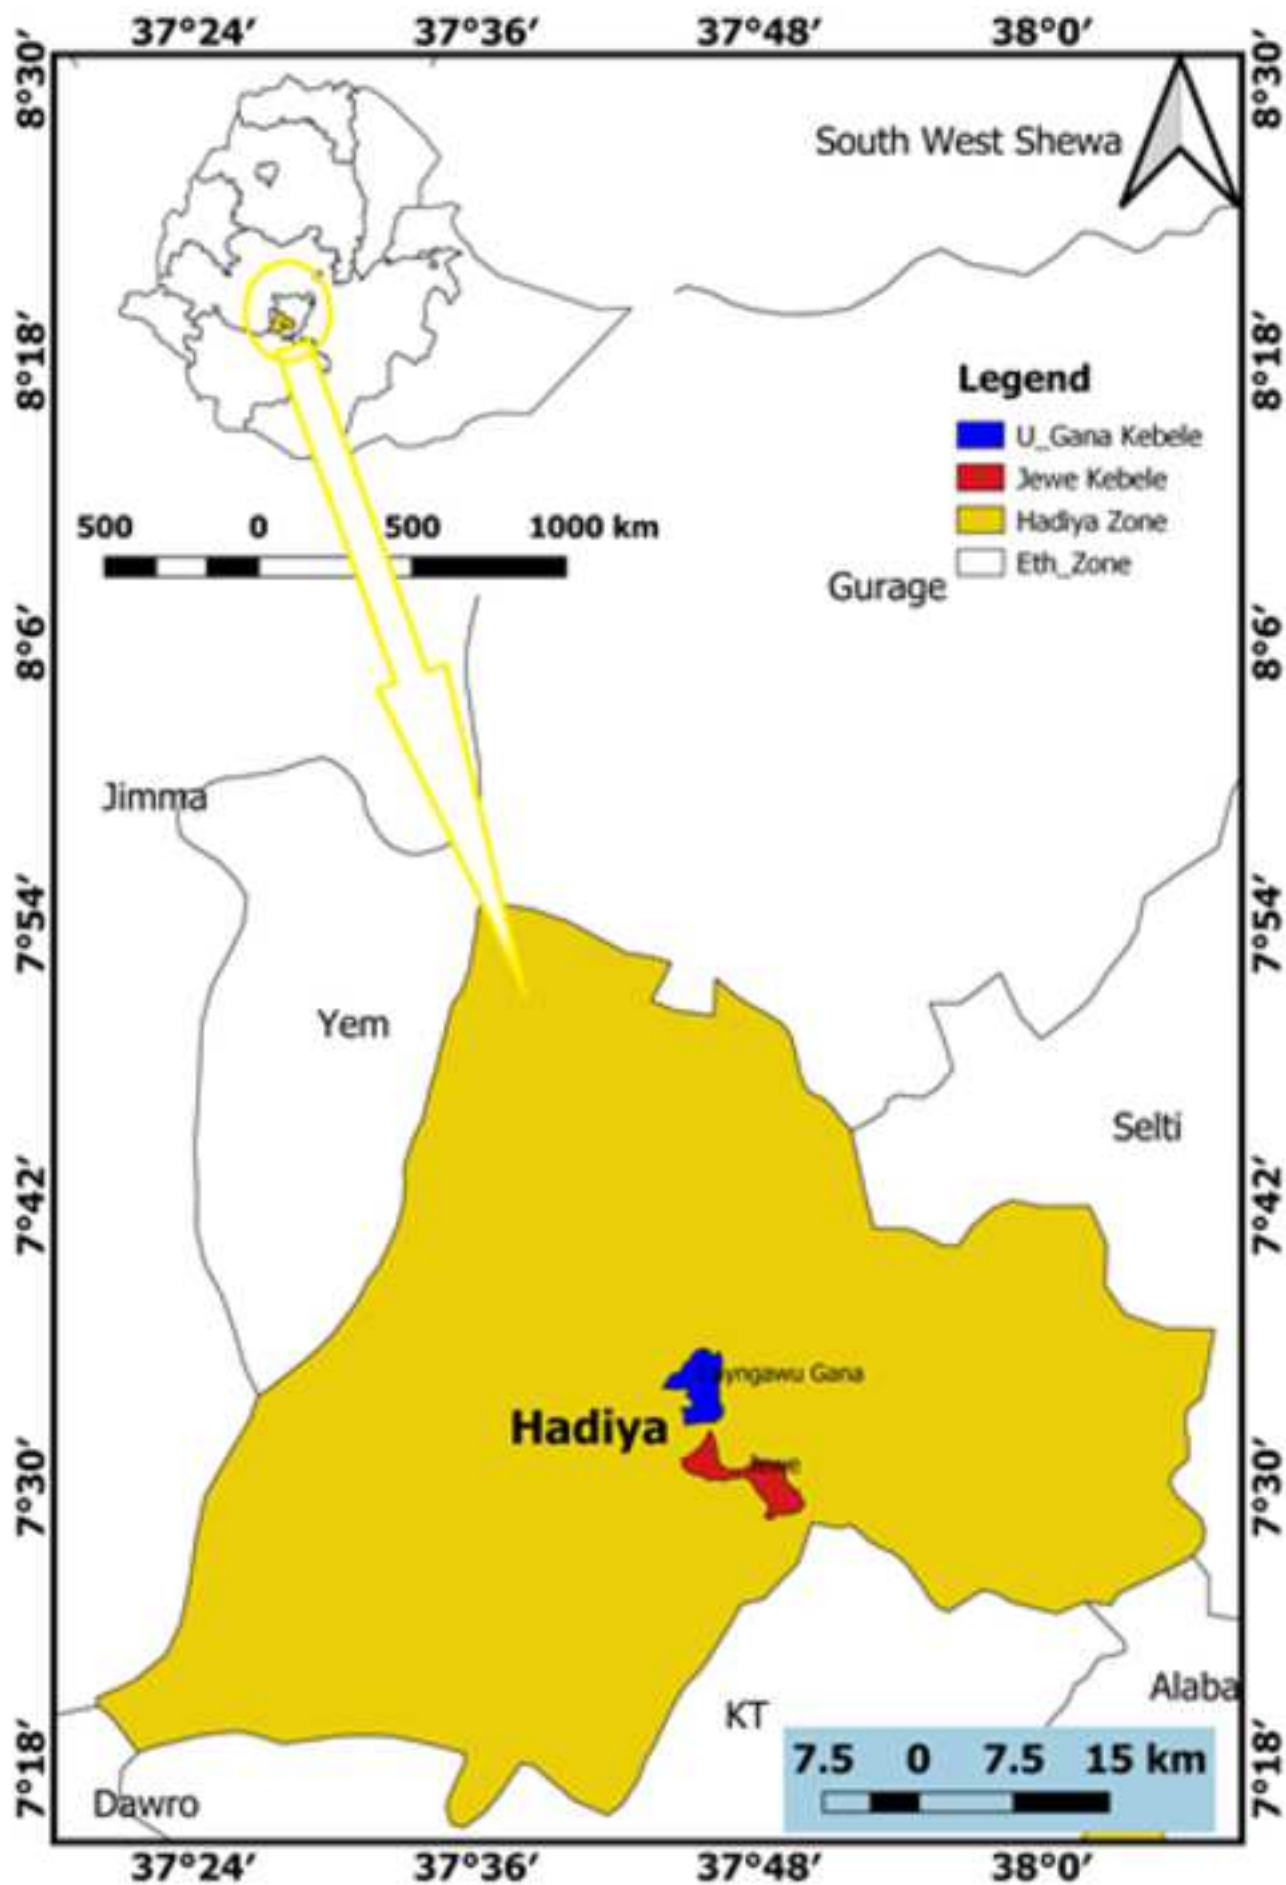

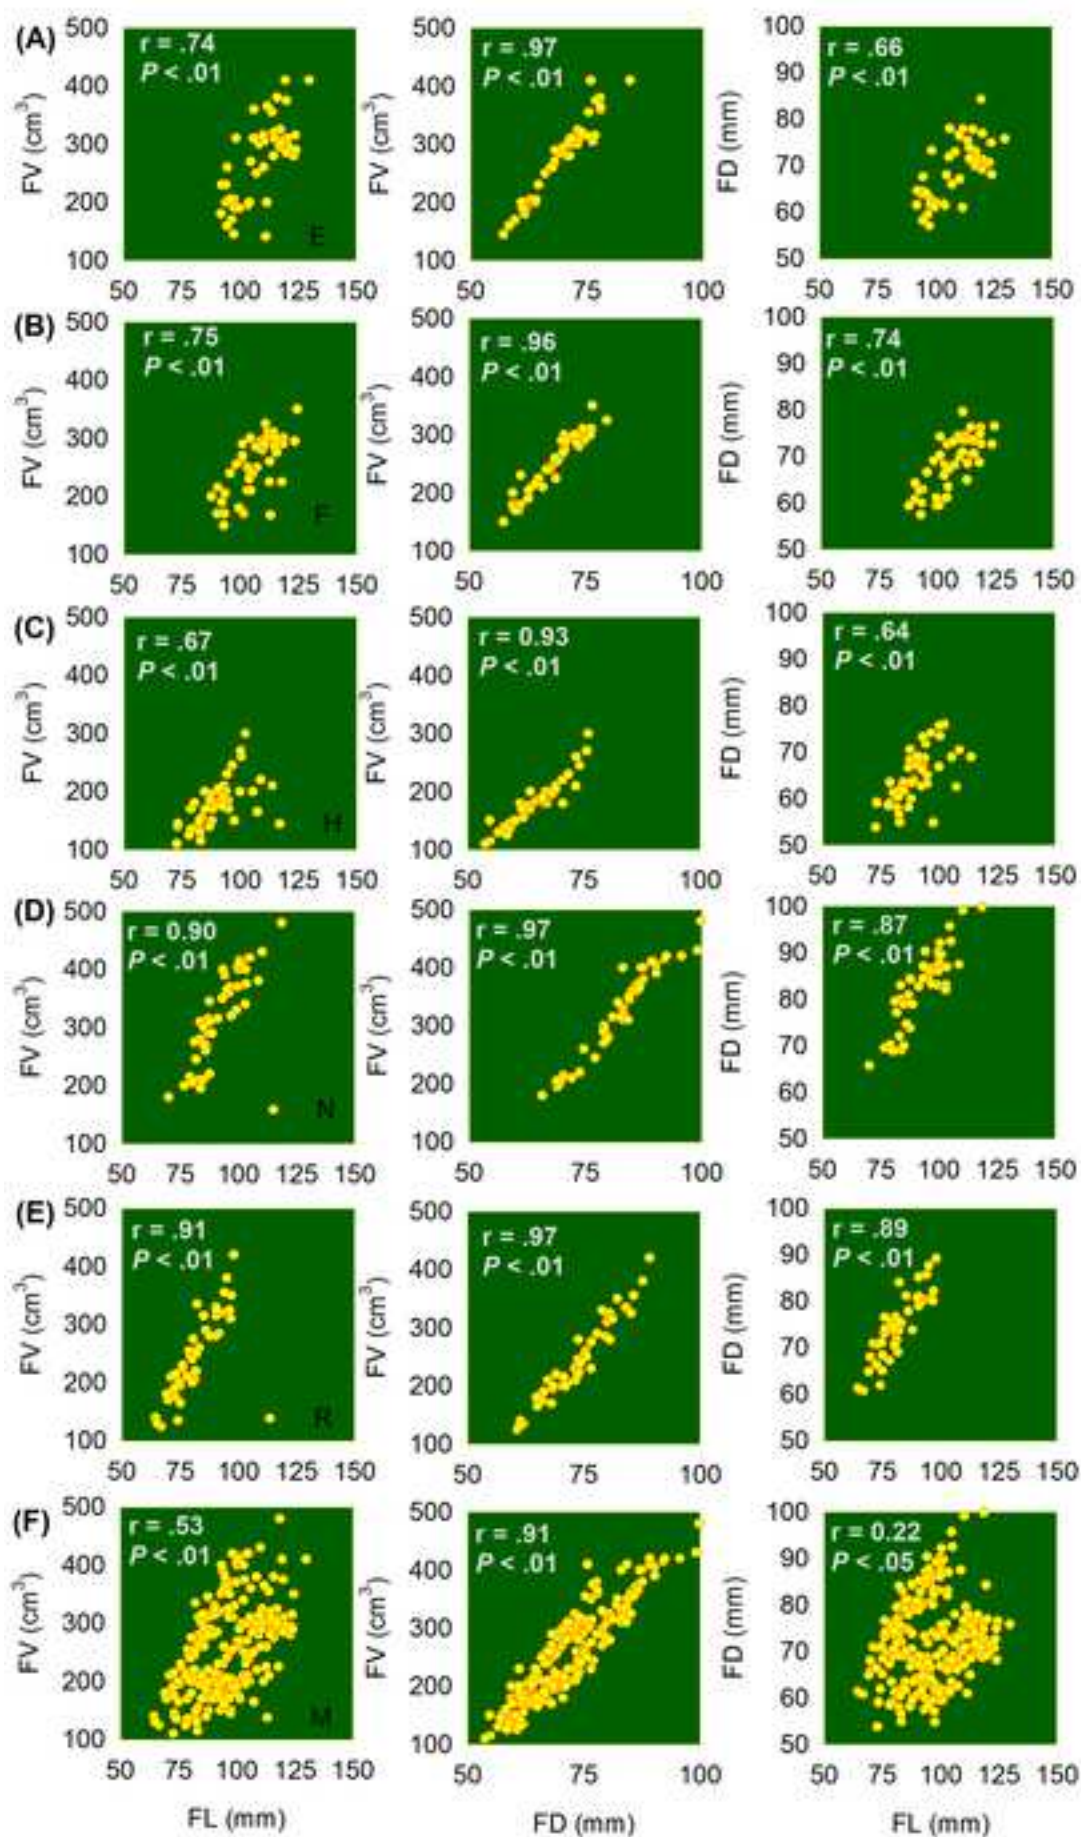

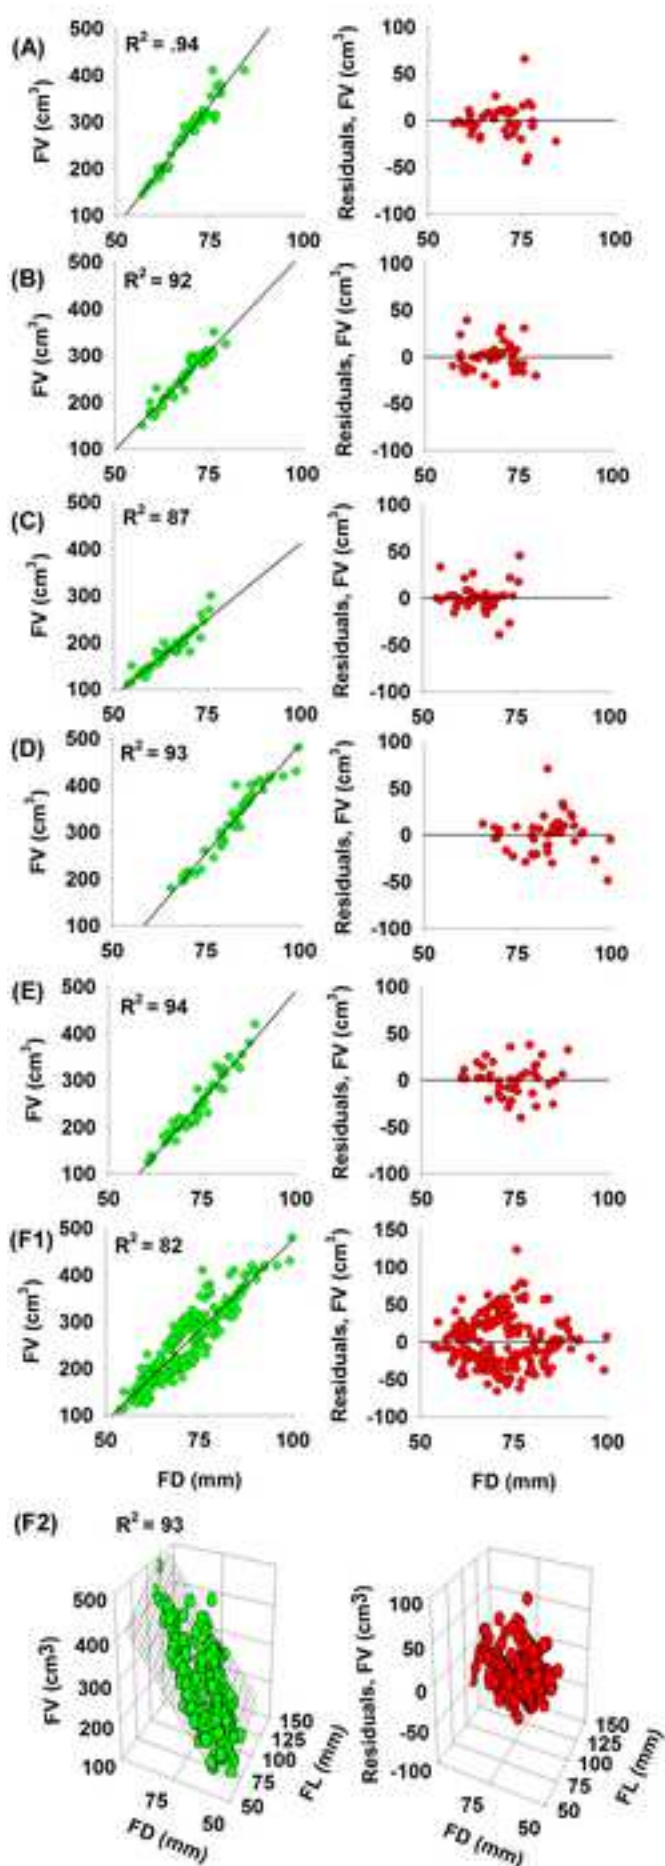

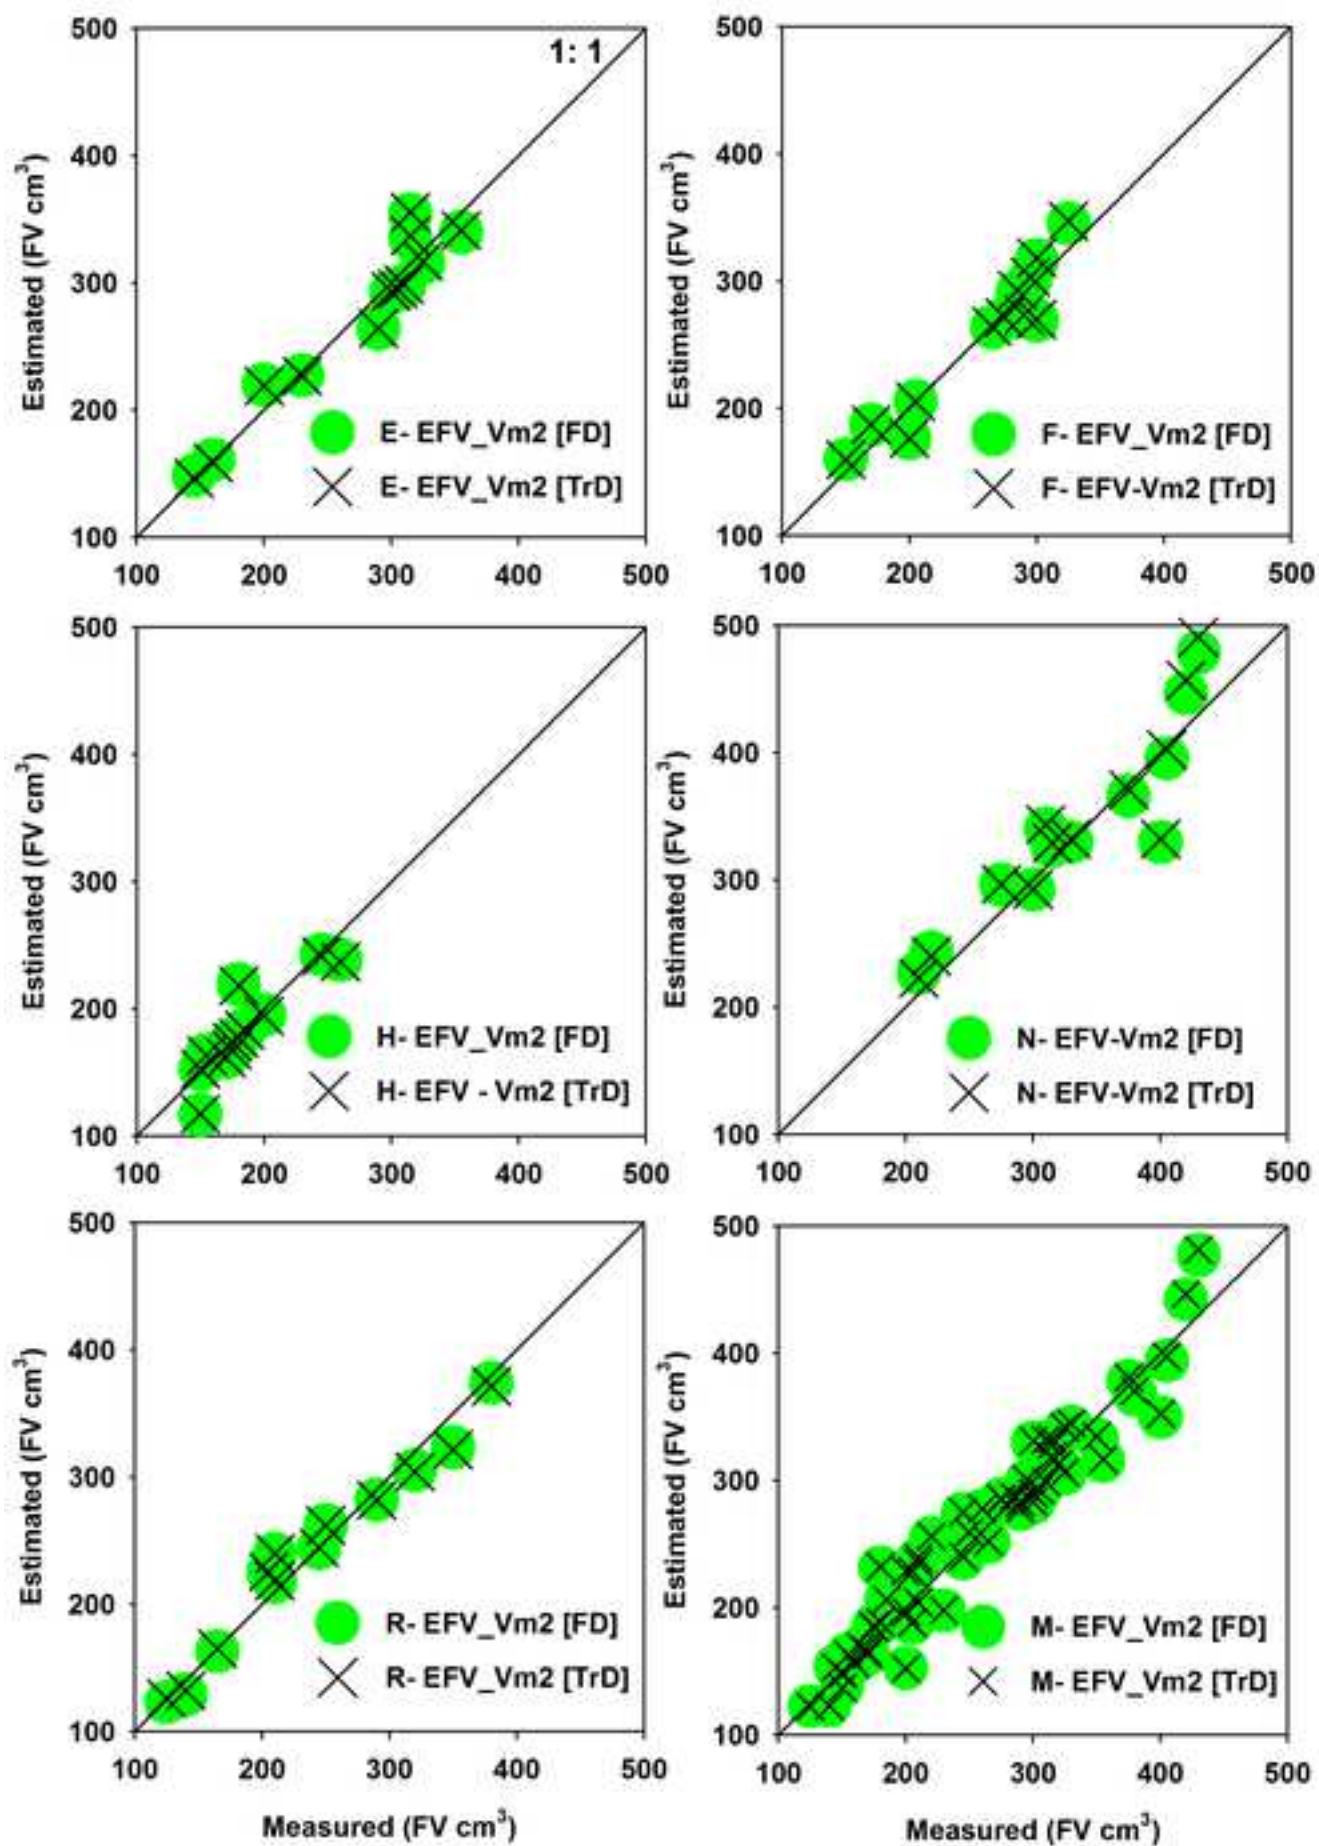

Supplement: pone.0263564.s003.pdf [file pone.0263564.s003.pdf]
