# Supplementary material for: Volume estimation models for avocado fruit
Source: PubMed Central journal article supplement (PMC8812970; doi:10.1371/journal.pone.0263564), 2022-02-03
Supplement: pone.0263564.s001.pdf [file pone.0263564.s001.pdf]

## Supplementary Information

### Volume estimation models for avocado fruit

Mulugeta Mokia<sup>a\*</sup>, Aster Gebrekirstos<sup>b</sup>, Hadia Said<sup>a</sup>, Kiros Hadgu<sup>a</sup>, Niguse Hagazi<sup>a</sup>, Workneh Dubale<sup>c</sup>, Achim Bräuning<sup>d</sup>

<sup>a</sup>World Agroforestry (ICRAF), C/O ILRI Campus, Gurd Shola, P.O. Box 5689, Addis

Ababa, Ethiopia

<sup>b</sup>World Agroforestry (ICRAF), United Nations Avenue, P.O. Box 30677-00100, Nairobi, Kenya

<sup>c</sup>International Livestock Research Institute (ILRI), Addis Ababa, Ethiopia.

<sup>d</sup>Institute of Geography, Friedrich-Alexander-University Erlangen-Nuremberg, Wetterkreuz 15, 91058, Erlangen, Germany

\*Corresponding author, E-mail: [m.mokria@cgiar.org](mailto:m.mokria@cgiar.org); [mgmokria@gmail.com](mailto:mgmokria@gmail.com); ORCID: <https://orcid.org/0000-0002-7812-8296>

Ettinger

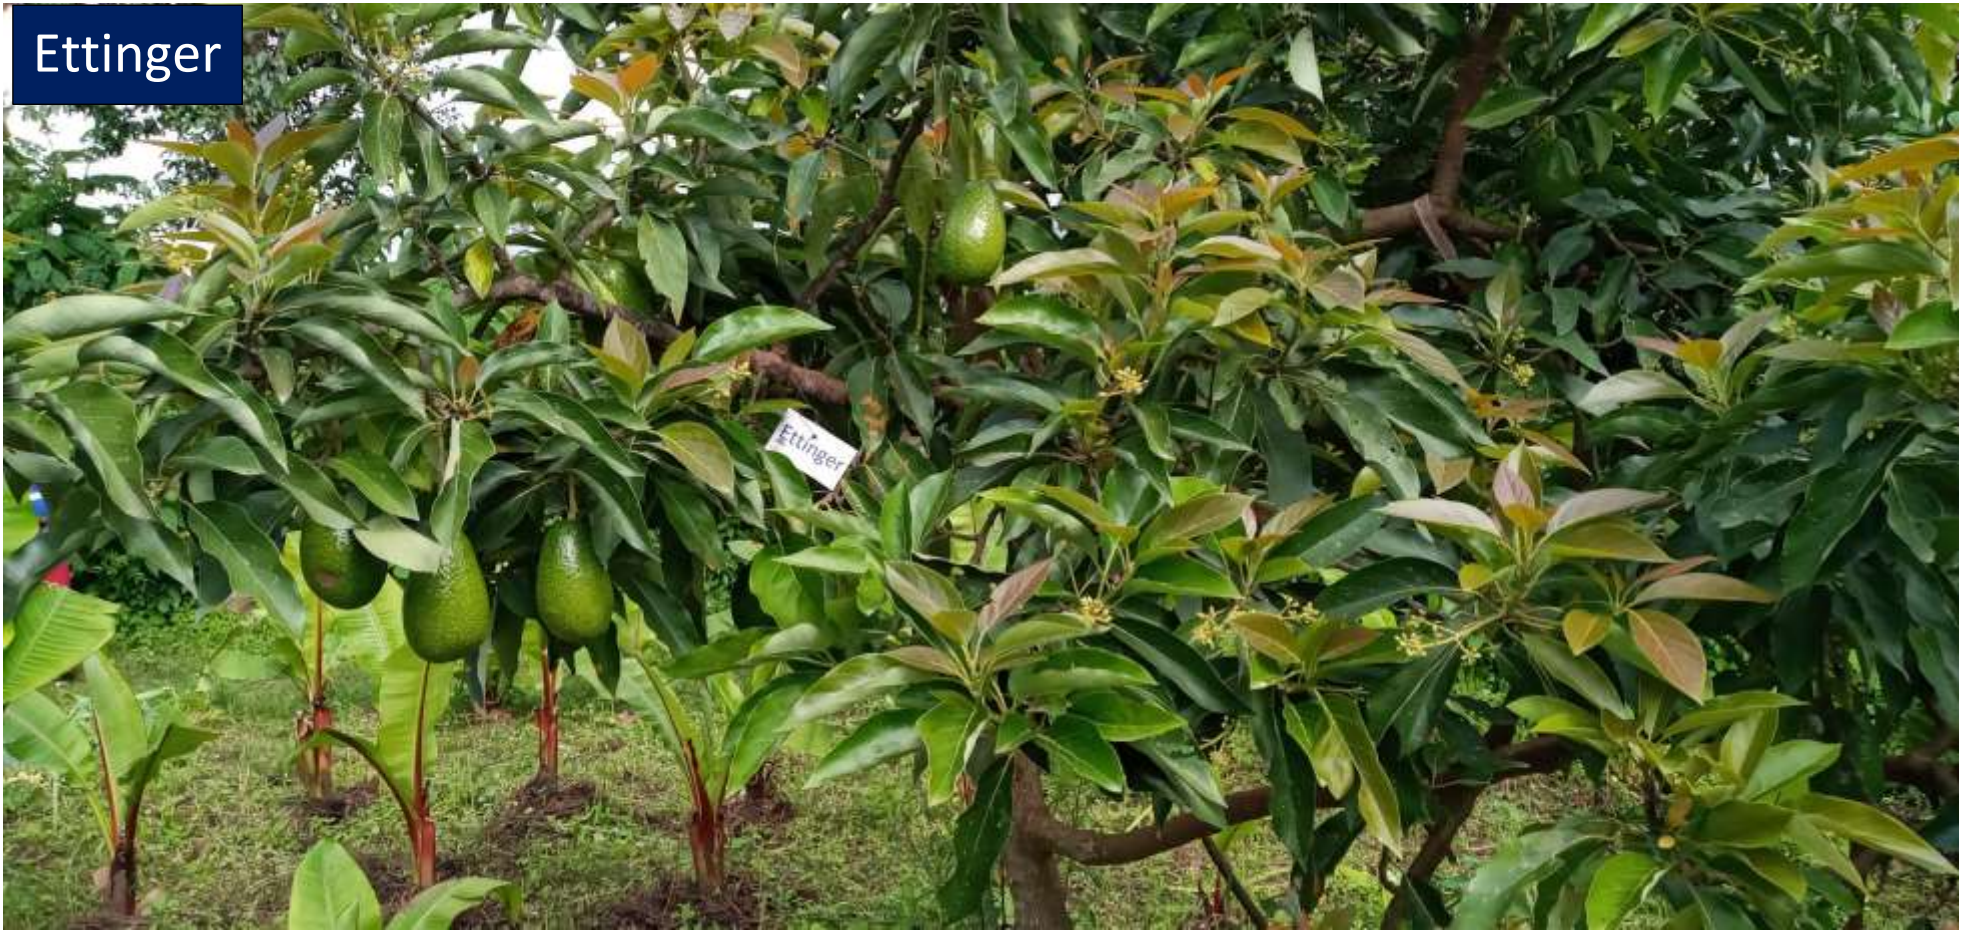

Source: *Mulugeta Mokia*

Fuerte

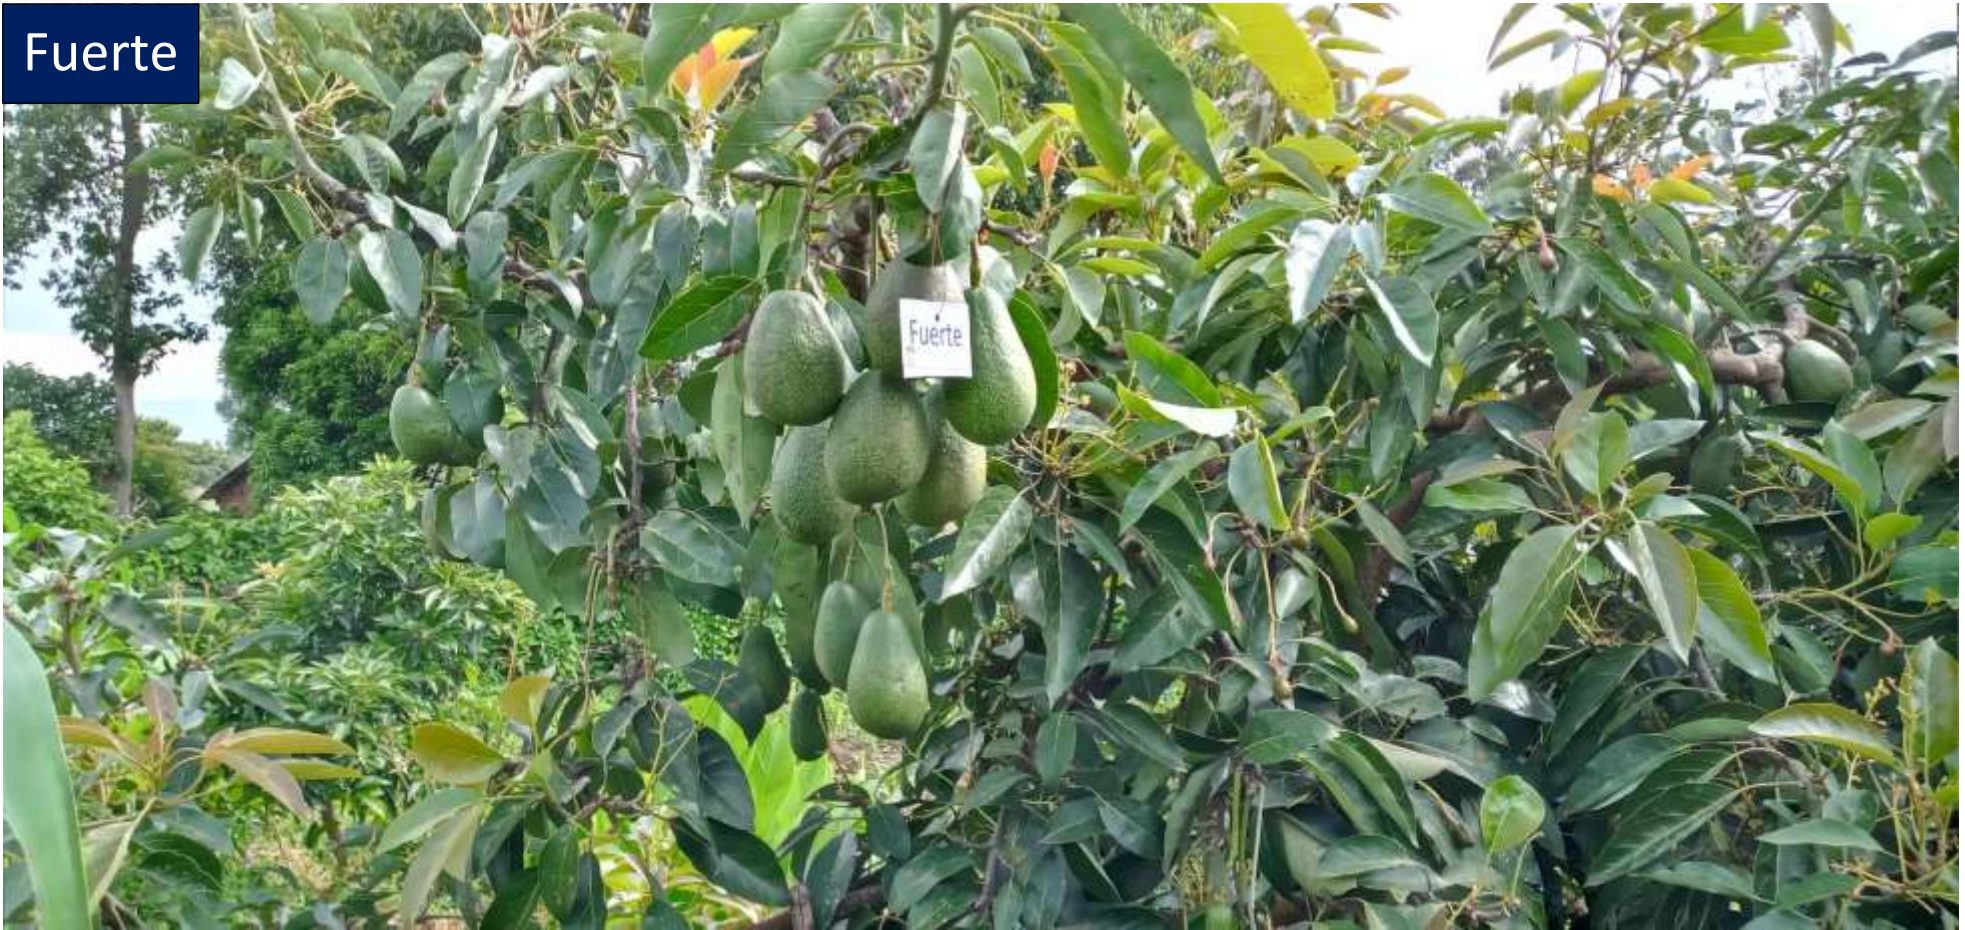

Source: *Mulugeta Mokia*

Hass

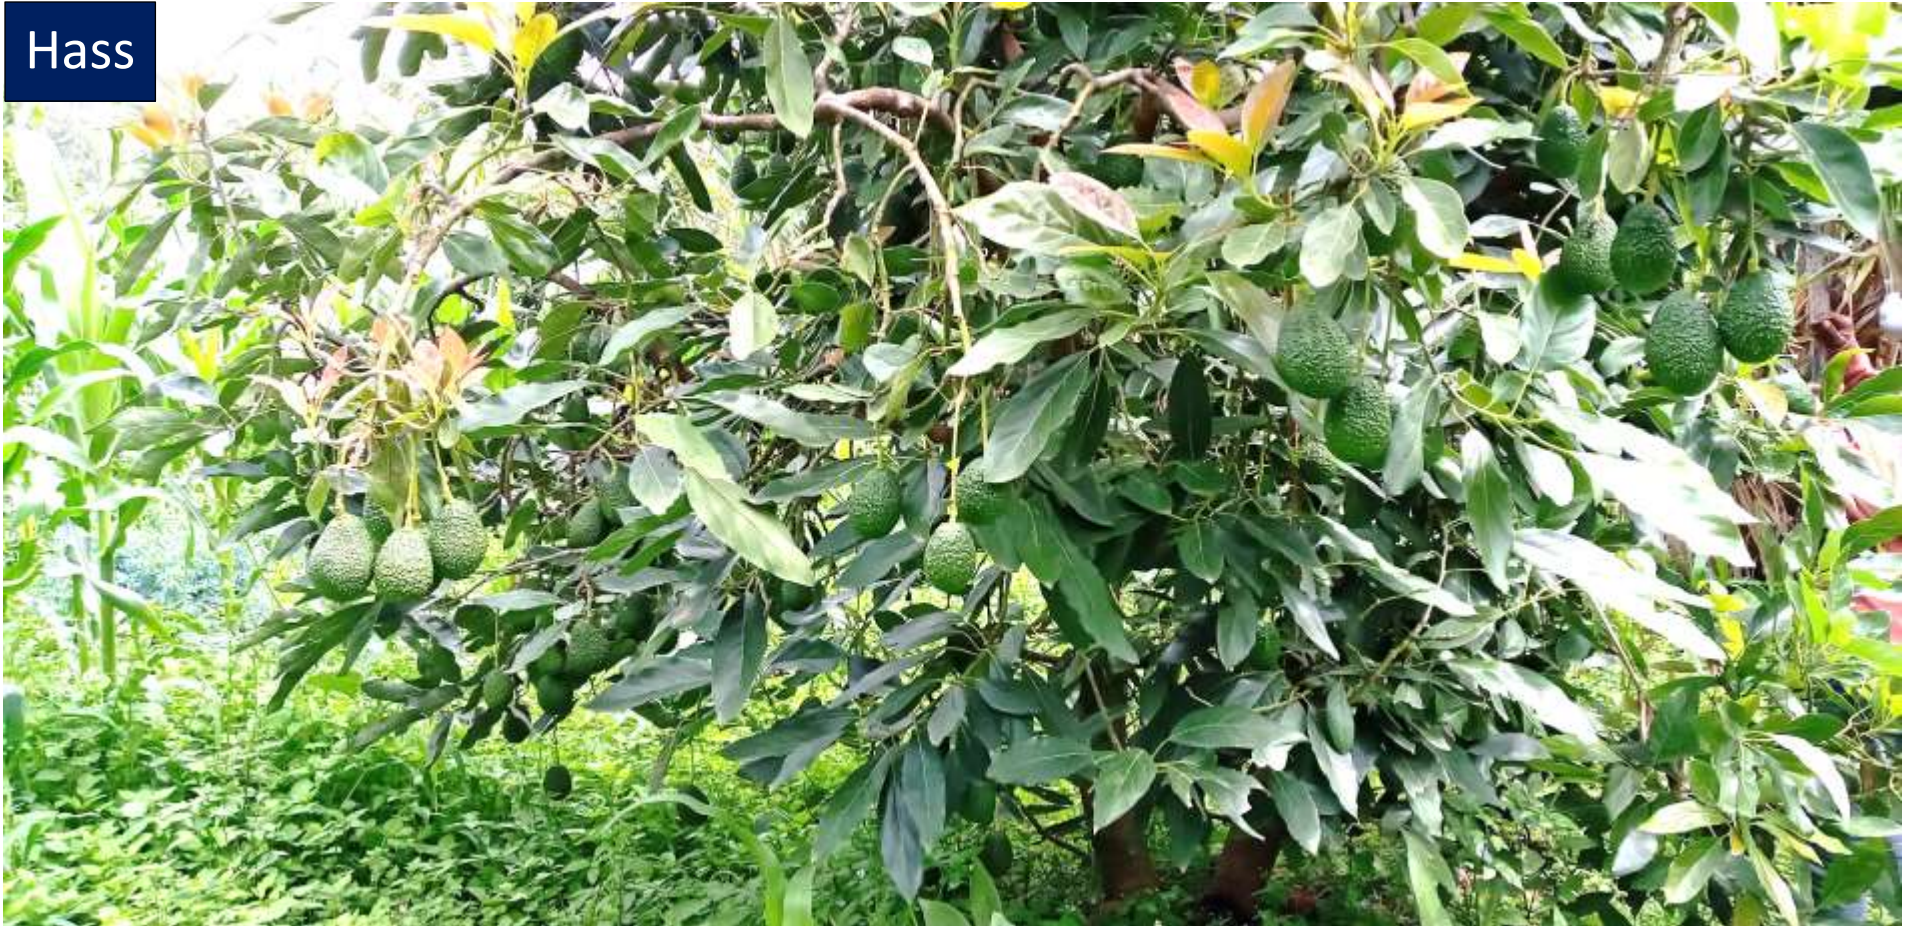

Source: *Mulugeta Mokria*

Nabal

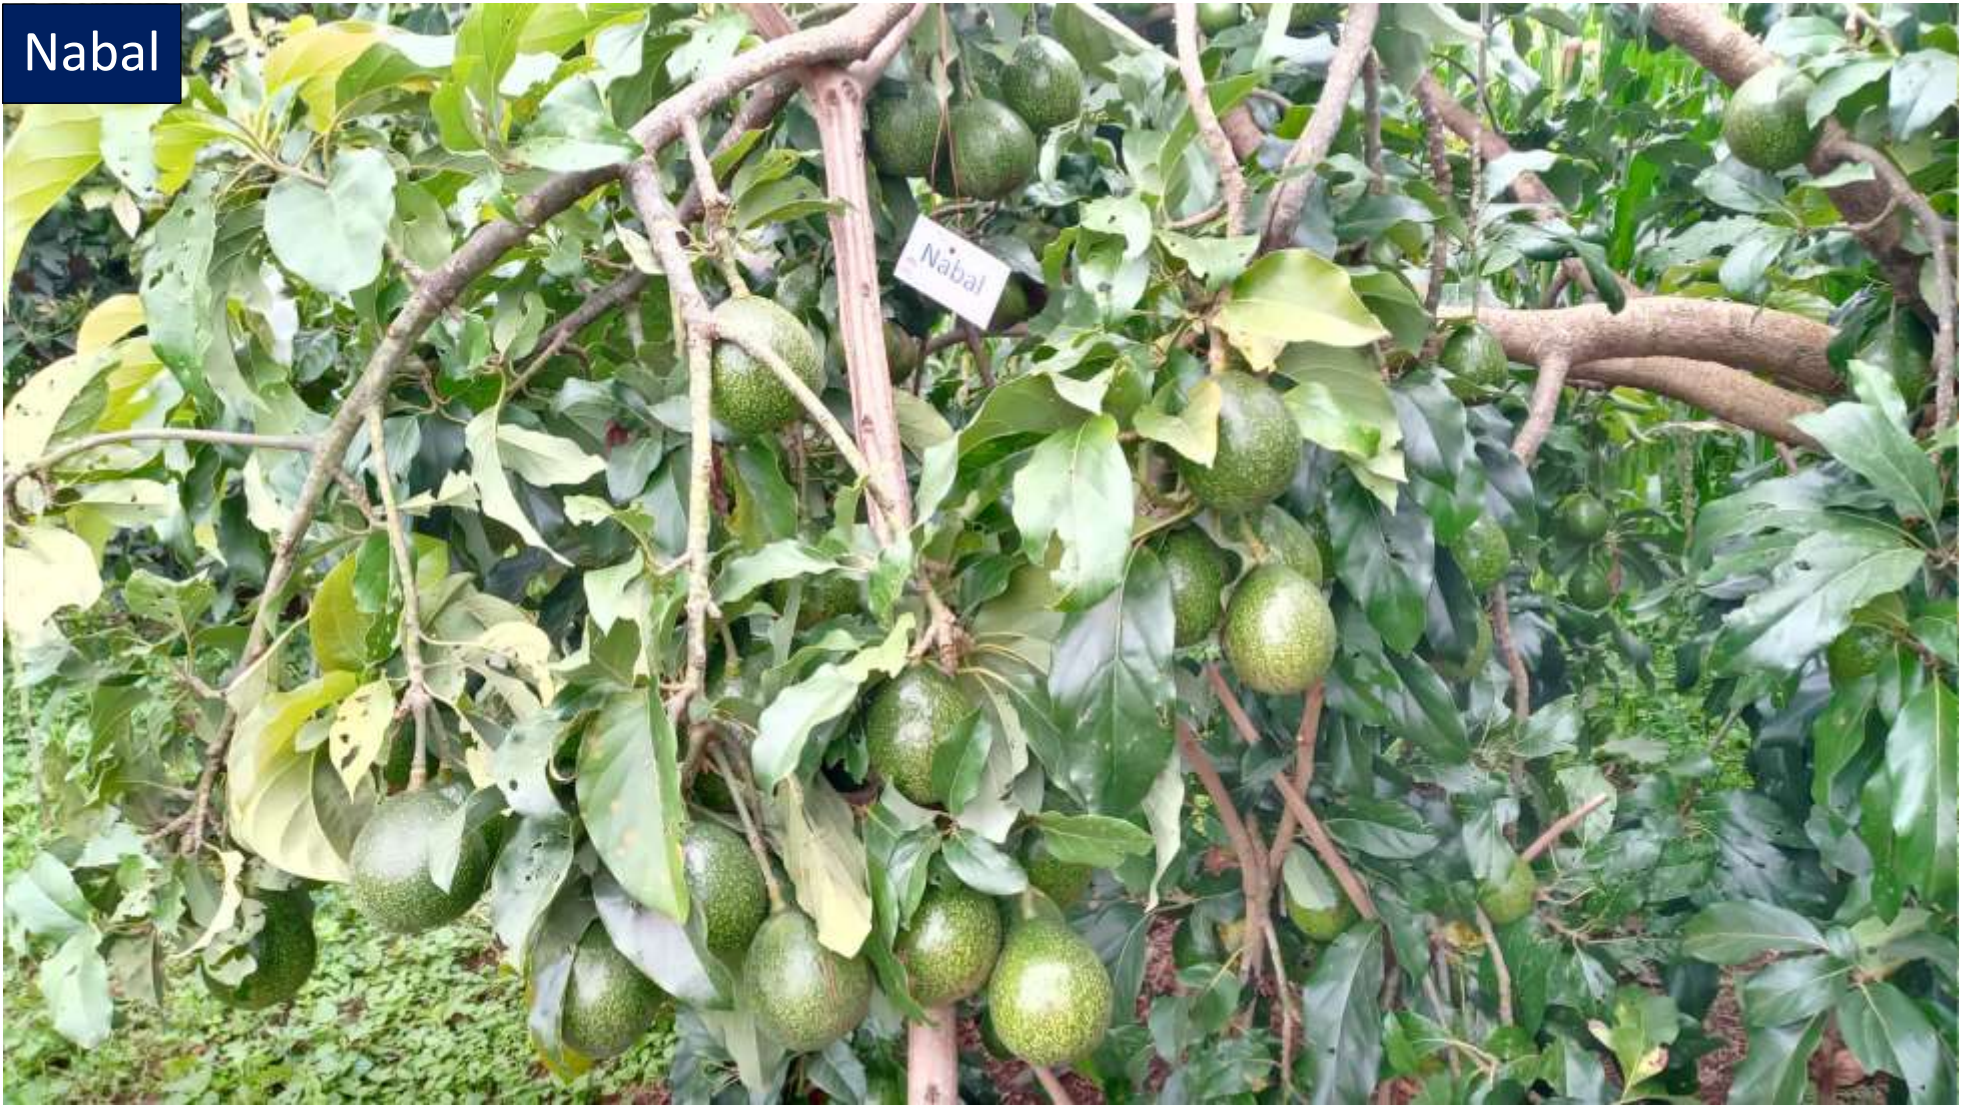

Source: *Mulugeta Mokria*

Reed

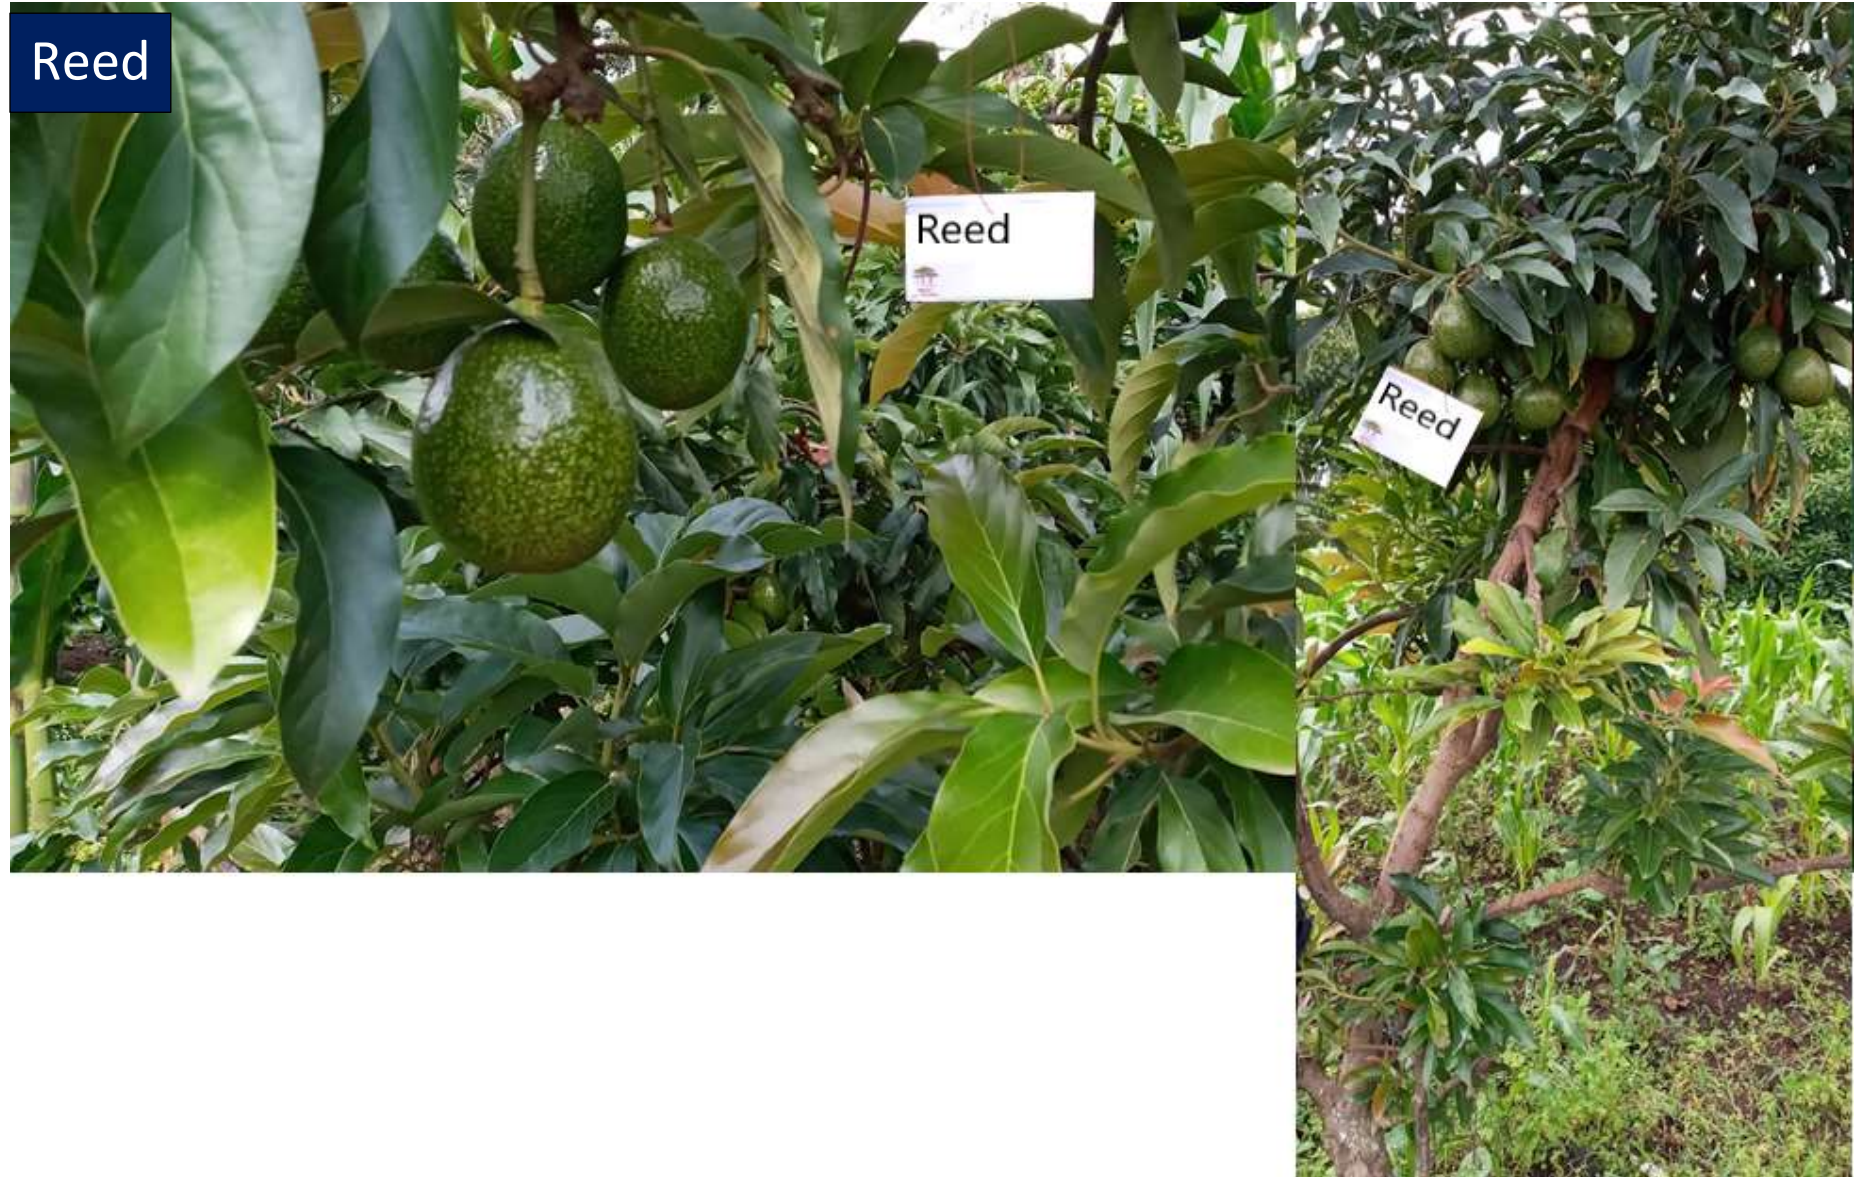

Source: *Mulugeta Mokria*
